# Supplementary material
Source: HighWire-hosted journal article supplement (https://www.cmajopen.ca/highwire/filestream/84653/field_highwire_adjunct_files/1/2020-0176-Original-submission.pdf)
Supplement: 2020-0176-Original-submission.pdf [file 2020-0176-Original-submission.pdf]

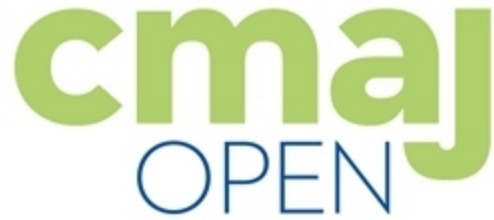

**Post discharge after surgery Virtual Care with Remote Automated Monitoring technology (PVC-RAM) versus standard care randomized controlled trial**

|                               |                                                                                                                                                                                                                                                                                                                                                                                                                                                                                                                                                                                                                                                                                                                                                                                                                                                                                                                                                                                                                                                                                                                                                                                                                                                                                                                                                                                                                                                                                                                                                                                                                                                                                                                                                                                                                                                                                                                                                                                                                                                                  |
|-------------------------------|------------------------------------------------------------------------------------------------------------------------------------------------------------------------------------------------------------------------------------------------------------------------------------------------------------------------------------------------------------------------------------------------------------------------------------------------------------------------------------------------------------------------------------------------------------------------------------------------------------------------------------------------------------------------------------------------------------------------------------------------------------------------------------------------------------------------------------------------------------------------------------------------------------------------------------------------------------------------------------------------------------------------------------------------------------------------------------------------------------------------------------------------------------------------------------------------------------------------------------------------------------------------------------------------------------------------------------------------------------------------------------------------------------------------------------------------------------------------------------------------------------------------------------------------------------------------------------------------------------------------------------------------------------------------------------------------------------------------------------------------------------------------------------------------------------------------------------------------------------------------------------------------------------------------------------------------------------------------------------------------------------------------------------------------------------------|
| Journal:                      | <i>CMAJ Open</i>                                                                                                                                                                                                                                                                                                                                                                                                                                                                                                                                                                                                                                                                                                                                                                                                                                                                                                                                                                                                                                                                                                                                                                                                                                                                                                                                                                                                                                                                                                                                                                                                                                                                                                                                                                                                                                                                                                                                                                                                                                                 |
| Manuscript ID                 | CMAJOpen-2020-0176                                                                                                                                                                                                                                                                                                                                                                                                                                                                                                                                                                                                                                                                                                                                                                                                                                                                                                                                                                                                                                                                                                                                                                                                                                                                                                                                                                                                                                                                                                                                                                                                                                                                                                                                                                                                                                                                                                                                                                                                                                               |
| Manuscript Type:              | Protocol                                                                                                                                                                                                                                                                                                                                                                                                                                                                                                                                                                                                                                                                                                                                                                                                                                                                                                                                                                                                                                                                                                                                                                                                                                                                                                                                                                                                                                                                                                                                                                                                                                                                                                                                                                                                                                                                                                                                                                                                                                                         |
| Date Submitted by the Author: | 22-Jul-2020                                                                                                                                                                                                                                                                                                                                                                                                                                                                                                                                                                                                                                                                                                                                                                                                                                                                                                                                                                                                                                                                                                                                                                                                                                                                                                                                                                                                                                                                                                                                                                                                                                                                                                                                                                                                                                                                                                                                                                                                                                                      |
| Complete List of Authors:     | <p>McGillion, Michael ; McMaster University, School of Nursing; Population Health Research Institute<br/>         Parlow, Joel ; Queen's University, Anesthesiology and Perioperative Medicine; Kingston Health Sciences Centre, Anesthesiology and Perioperative Medicine<br/>         Borges, Flavia; Population Health Research Institute; McMaster University, Medicine<br/>         Marcucci, Maura; McMaster University, Research Methods, Evidence, and Impact; McMaster University, Medicine<br/>         Jacka, Michael John; University of Alberta, Critical Care and Anesthesiology<br/>         Adili, Anthony; McMaster University, Surgery; St. Joseph's Healthcare Hamilton<br/>         Lalu, Manoj; Ottawa Hospital Research Institute, Clinical Epidemiology Program; Ottawa Hospital, Anesthesiology and Pain Medicine<br/>         Yang, Homer ; University of Western Ontario, Anesthesia and Perioperative Medicine; London Health Sciences Centre, Anesthesia and Perioperative Medicine<br/>         Patel, Ameen; McMaster University, Medicine; Hamilton Health Sciences<br/>         O'Leary, Susan; McMaster University, Anesthesia; Hamilton Health Sciences<br/>         Tandon, Vikas; McMaster University, Medicine; St. Joseph's Healthcare Hamilton<br/>         Hamilton, Gavin; University of Ottawa, Anesthesiology and Pain Medicine; Ottawa Hospital Research Institute<br/>         Mrkobrada, Marko; University of Western Ontario, Medicine<br/>         Ouellette, Carley; McMaster University, School of Nursing; Hamilton Health Sciences<br/>         Bird, Marissa; McMaster University, School of Nursing<br/>         Ofori, Sandra; University of Port Harcourt, Internal Medicine<br/>         Conen, David; Population Health Research Institute; McMaster University, Medicine<br/>         Roshanov, Pavel; University of Western Ontario, Medicine<br/>         Harvey, Valerie; Population Health Research Institute<br/>         Guyatt, Gordon; McMaster University, Health Research, Evidence and</p> |

1  
2  
3  
4  
5  
6  
7  
8  
9  
10  
11  
12  
13  
14  
15  
16  
17  
18  
19  
20  
21  
22  
23  
24  
25  
26  
27  
28  
29  
30  
31  
32  
33  
34  
35  
36  
37  
38  
39  
40  
41  
42  
43  
44  
45  
46  
47  
48  
49  
50  
51  
52  
53  
54  
55  
56  
57  
58  
59  
60

|  |                                                                                                                                                                     |
|--|---------------------------------------------------------------------------------------------------------------------------------------------------------------------|
|  | Impact                                                                                                                                                              |
|  | Le Manach, Yannick; McMaster University, Anesthesia; Population Health Research Institute                                                                           |
|  | Bangdiwala, Shrikant; Population Health Research Institute; McMaster University, Health Research, Evidence and Impact                                               |
|  | Arellano, Ramiro; Queen's University, Anesthesiology and Perioperative Medicine; Kingston Health Sciences Centre, Anesthesiology and Perioperative Medicine         |
|  | Scott, Ted; Hamilton Health Sciences                                                                                                                                |
|  | Lounsbury, Jennifer; McMaster University, School of Nursing; Hamilton Health Sciences                                                                               |
|  | Taylor, Dylan; University of Alberta, Medicine                                                                                                                      |
|  | Nenshi, Rahima; McMaster University, Surgery; St. Joseph's Healthcare Hamilton                                                                                      |
|  | Forster, Alan; Ottawa Hospital Research Institute; University of Ottawa, Medicine                                                                                   |
|  | Nagappa, Mahesh; University of Western Ontario, Anesthesiology and Perioperative Medicine; London Health Sciences Centre, Anesthesiology and Perioperative Medicine |
|  | Lamy, Andre; Population Health Research Institute; Hamilton Health Sciences                                                                                         |
|  | Peter, Elizabeth; University of Toronto, Faculty of Nursing                                                                                                         |
|  | Levesque, Kelsea; McMaster University, School of Nursing                                                                                                            |
|  | Marosi, Kristen; Queen's University, Medicine                                                                                                                       |
|  | Chaudhry, Sultan; McMaster University, Medicine                                                                                                                     |
|  | Haider, Shariq; McMaster University, Medicine                                                                                                                       |
|  | Deuchar, Lesly; Alberta Health Services                                                                                                                             |
|  | LeBlanc, Brandi; St. Joseph's Healthcare Hamilton                                                                                                                   |
|  | McCartney, Colin; University of Ottawa, Anesthesiology and Pain Medicine                                                                                            |
|  | Schemitsch, Emil; London Health Sciences Centre, Surgery; Western University, Surgery                                                                               |
|  | Vincent, Jessica; Population Health Research Institute,                                                                                                             |
|  | Pettit, Shirley; Hamilton Health Sciences                                                                                                                           |
|  | Paul, James; McMaster University, Anesthesia                                                                                                                        |
|  | DuMerton, Deborah; Kingston Health Sciences Centre, Anesthesiology                                                                                                  |
|  | Djuric Paulin, Angela; Hamilton Health Sciences                                                                                                                     |
|  | Simunovic, Marko; McMaster University, Surgery                                                                                                                      |
|  | Williams, David; University of Alberta, Surgery                                                                                                                     |
|  | Samantha, Halman; Ottawa Hospital Research Institute; University of Ottawa, Medicine                                                                                |
|  | Schlacta, Christopher; University of Western Ontario, Surgery                                                                                                       |
|  | Shelley, Jessica; Kingston Health Sciences Centre, Anesthesiology                                                                                                   |
|  | Harlock, John; McMaster University, Surgery                                                                                                                         |
|  | Meyer, Ralph; McMaster University, Oncology; Hamilton Health Sciences                                                                                               |
|  | Graham, Michelle; University of Alberta, Medicine                                                                                                                   |
|  | Shanthanna, Harsha; St. Joseph's Healthcare Hamilton, Anesthesia; McMaster University Department of Anaesthesia, Anesthesia                                         |
|  | Parry, Neil; London Health Sciences Centre, Critical Care                                                                                                           |
|  | Pichora, David; Queen's University, Surgery; Kingston Health Sciences Centre, Surgery                                                                               |
|  | Yousuf, Haroon; McMaster University, Medicine                                                                                                                       |
|  | Moloo, Husein; University of Ottawa, Division of General Surgery; Ottawa Hospital, Department of Surgery                                                            |
|  | Sehmbi, Herman; University of Western Ontario, Anesthesia and Perioperative Medicine; London Health Sciences Centre, Anesthesia and Perioperative Medicine          |
|  | Waggott, Melissa; Ottawa Hospital                                                                                                                                   |
|  | Belley-Côté, Emilie; McMaster University, Medicine; Population Health Research Institute                                                                            |
|  | Whitlock, Richard; McMaster University, Health Research Methods,                                                                                                    |

|                         |                                                                                                                                                                                                                                                                                                                                                                                                                                                                                                                                                                                                                                                                                                                                                                                                                                                                                                                                                                                                                                                                                                                                                                                                                                                                                                                                                                                                                                                                                                                                                                                                                                                                                                                                                                                                                                                |
|-------------------------|------------------------------------------------------------------------------------------------------------------------------------------------------------------------------------------------------------------------------------------------------------------------------------------------------------------------------------------------------------------------------------------------------------------------------------------------------------------------------------------------------------------------------------------------------------------------------------------------------------------------------------------------------------------------------------------------------------------------------------------------------------------------------------------------------------------------------------------------------------------------------------------------------------------------------------------------------------------------------------------------------------------------------------------------------------------------------------------------------------------------------------------------------------------------------------------------------------------------------------------------------------------------------------------------------------------------------------------------------------------------------------------------------------------------------------------------------------------------------------------------------------------------------------------------------------------------------------------------------------------------------------------------------------------------------------------------------------------------------------------------------------------------------------------------------------------------------------------------|
|                         | Evidence and Impact; Population Health Research Institute<br>Devereaux, PJ; Population Health Research Institute; McMaster<br>University, Department of Health Research Methods, Evidence and<br>Impact                                                                                                                                                                                                                                                                                                                                                                                                                                                                                                                                                                                                                                                                                                                                                                                                                                                                                                                                                                                                                                                                                                                                                                                                                                                                                                                                                                                                                                                                                                                                                                                                                                        |
| Keywords:               | Cardiovascular medicine, Community medicine, Diagnostics, Health<br>services research, Nursing, Surgery                                                                                                                                                                                                                                                                                                                                                                                                                                                                                                                                                                                                                                                                                                                                                                                                                                                                                                                                                                                                                                                                                                                                                                                                                                                                                                                                                                                                                                                                                                                                                                                                                                                                                                                                        |
| More Detailed Keywords: | Remote automated monitoring technology, Virtual care, Non-elective<br>surgery, Randomized controlled trial, Standard care, Days alive at home                                                                                                                                                                                                                                                                                                                                                                                                                                                                                                                                                                                                                                                                                                                                                                                                                                                                                                                                                                                                                                                                                                                                                                                                                                                                                                                                                                                                                                                                                                                                                                                                                                                                                                  |
| Abstract:               | <p>Background: After non-elective (i.e., semi-urgent, urgent, and emergent) surgeries, patients discharged from hospitals are at risk of re-admissions, emergency department visits, or death. During the Coronavirus Disease 2019 (COVID-19) pandemic, we are undertaking a trial to determine if virtual care with remote automated monitoring (RAM) compared to standard care will increase days alive at home, in adults being discharged after non-elective surgery.</p> <p>Methods: We will randomize 900 adults, being discharged after non-elective surgery, to virtual care with RAM or standard care, at 8 Canadian hospitals. Patients and health-care providers know treatment assignments. Outcome adjudicators are masked to treatment allocations. Patients in the experimental group learn how to use the tablet computer and RAM technology, which measures the following biophysical parameters: blood pressure, heart rate, respiratory rate, oxygen saturation, temperature, and weight. For 30 days, patients take daily biophysical measurements and complete a recovery survey. Patients interact with a virtual nurse daily on days 1-15 and every other day from days 16-30. Nurses escalate care to pre-assigned and available physicians if RAM measurements exceed predetermined thresholds, patients report specific symptoms (e.g., syncope), a medication error is identified, or nurses have concerns they cannot resolve. The primary outcome is days alive at home during the 30 days after randomization.</p> <p>Interpretation: This trial will answer an important question informing how to manage surgical patients after discharge in the setting of the COVID-19 pandemic and offer insights for management of non-elective surgical patients in general.</p> <p>Trial Registration: NCT04344665.</p> |

SCHOLARONE™  
Manuscripts

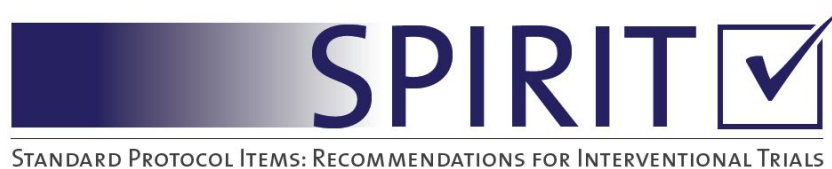

SPIRIT 2013 Checklist: Recommended items to address in a clinical trial protocol and related documents\*

| Section/item                      | Item No | Description                                                                                                                                                                                                                                                                                                       |
|-----------------------------------|---------|-------------------------------------------------------------------------------------------------------------------------------------------------------------------------------------------------------------------------------------------------------------------------------------------------------------------|
| <b>Administrative information</b> |         |                                                                                                                                                                                                                                                                                                                   |
| Title                             | 1       | Descriptive title identifying the study design, population, interventions, and, if applicable, trial acronym- <a href="#">page 1</a>                                                                                                                                                                              |
| Trial registration                | 2a      | Trial identifier and registry name. If not yet registered, name of intended registry- <a href="#">Abstract, page 2</a>                                                                                                                                                                                            |
|                                   | 2b      | All items from the World Health Organization Trial Registration Data Set <a href="#">page 2</a>                                                                                                                                                                                                                   |
| Protocol version                  | 3       | Date and version identifier <a href="#">Not applicable</a>                                                                                                                                                                                                                                                        |
| Funding                           | 4       | Sources and types of financial, material, and other support- <a href="#">page 13</a>                                                                                                                                                                                                                              |
| Roles and responsibilities        | 5a      | Names, affiliations, and roles of protocol contributors- <a href="#">page 13</a>                                                                                                                                                                                                                                  |
|                                   | 5b      | Name and contact information for the trial sponsor- <a href="#">page 13</a>                                                                                                                                                                                                                                       |
|                                   | 5c      | Role of study sponsor and funders, if any, in study design; collection, management, analysis, and interpretation of data; writing of the report; and the decision to submit the report for publication, including whether they will have ultimate authority over any of these activities- <a href="#">page 13</a> |
|                                   | 5d      | Composition, roles, and responsibilities of the coordinating centre, steering committee, endpoint adjudication committee, data management team, and other individuals or groups overseeing the trial, if applicable (see Item 21a for data monitoring committee)- <a href="#">page 11</a>                         |
| <b>Introduction</b>               |         |                                                                                                                                                                                                                                                                                                                   |
| Background and rationale          | 6a      | Description of research question and justification for undertaking the trial, including summary of relevant studies (published and unpublished) examining benefits and harms for each intervention- <a href="#">page 3</a>                                                                                        |
|                                   | 6b      | Explanation for choice of comparators- <a href="#">page 3</a>                                                                                                                                                                                                                                                     |
| Objectives                        | 7       | Specific objectives or hypotheses- <a href="#">page 7</a>                                                                                                                                                                                                                                                         |

1  
2  
3  
4  
5  
6  
7  
8  
9  
10  
11  
12  
13  
14  
15  
16  
17  
18  
19  
20  
21  
22  
23  
24  
25  
26  
27  
28  
29  
30  
31  
32  
33  
34  
35  
36  
37  
38  
39  
40  
41  
42  
43  
44  
45  
46  
47  
48  
49  
50  
51  
52  
53  
54  
55  
56  
57  
58  
59  
60

Trial design 8 Description of trial design including type of trial (eg, parallel group, crossover, factorial, single group), allocation ratio, and framework (eg, superiority, equivalence, noninferiority, exploratory)- [page 4](#)

### **Methods: Participants, interventions, and outcomes**

Study setting 9 Description of study settings (eg, community clinic, academic hospital) and list of countries where data will be collected. Reference to where list of study sites can be obtained- [page 4](#)

Eligibility criteria 10 Inclusion and exclusion criteria for participants. If applicable, eligibility criteria for study centres and individuals who will perform the interventions (eg, surgeons, psychotherapists) [page 4 and Supplemental Documents](#)

Interventions 11a Interventions for each group with sufficient detail to allow replication, including how and when they will be administered [pages 5 and 6](#)

11b Criteria for discontinuing or modifying allocated interventions for a given trial participant (eg, drug dose change in response to harms, participant request, or improving/worsening disease) [Supplemental Documents](#)

11c Strategies to improve adherence to intervention protocols, and any procedures for monitoring adherence (eg, drug tablet return, laboratory tests) [page 6](#)

11d Relevant concomitant care and interventions that are permitted or prohibited during the trial [pages 5 and 6](#)

Outcomes 12 Primary, secondary, and other outcomes, including the specific measurement variable (eg, systolic blood pressure), analysis metric (eg, change from baseline, final value, time to event), method of aggregation (eg, median, proportion), and time point for each outcome. Explanation of the clinical relevance of chosen efficacy and harm outcomes is strongly recommended [page 7](#)

Participant timeline 13 Time schedule of enrolment, interventions (including any run-ins and washouts), assessments, and visits for participants. A schematic diagram is highly recommended (see Figure) [pages 7 and 8](#)

Sample size 14 Estimated number of participants needed to achieve study objectives and how it was determined, including clinical and statistical assumptions supporting any sample size calculations [pages 8 and 9](#)

Recruitment 15 Strategies for achieving adequate participant enrolment to reach target sample size [page 4](#)

### **Methods: Assignment of interventions (for controlled trials)**

Allocation:

|    |                |     |                                                                           |
|----|----------------|-----|---------------------------------------------------------------------------|
| 1  |                |     |                                                                           |
| 2  | Sequence       | 16a | Method of generating the allocation sequence (eg, computer-               |
| 3  | generation     |     | generated random numbers), and list of any factors for stratification.    |
| 4  |                |     | To reduce predictability of a random sequence, details of any planned     |
| 5  |                |     | restriction (eg, blocking) should be provided in a separate document      |
| 6  |                |     | that is unavailable to those who enrol participants or assign             |
| 7  |                |     | interventions <a href="#">pages 4 and 5</a>                               |
| 8  |                |     |                                                                           |
| 9  |                |     |                                                                           |
| 10 | Allocation     | 16b | Mechanism of implementing the allocation sequence (eg, central            |
| 11 | concealment    |     | telephone; sequentially numbered, opaque, sealed envelopes),              |
| 12 | mechanism      |     | describing any steps to conceal the sequence until interventions are      |
| 13 |                |     | assigned <a href="#">page 5</a>                                           |
| 14 |                |     |                                                                           |
| 15 | Implementation | 16c | Who will generate the allocation sequence, who will enrol participants,   |
| 16 |                |     | and who will assign participants to interventions <a href="#">pages 5</a> |
| 17 |                |     |                                                                           |
| 18 |                |     |                                                                           |
| 19 | Blinding       | 17a | Who will be blinded after assignment to interventions (eg, trial          |
| 20 | (masking)      |     | participants, care providers, outcome assessors, data analysts), and      |
| 21 |                |     | how <a href="#">page 5</a>                                                |
| 22 |                |     |                                                                           |
| 23 |                | 17b | If blinded, circumstances under which unblinding is permissible, and      |
| 24 |                |     | procedure for revealing a participant's allocated intervention during     |
| 25 |                |     | the trial <a href="#">not applicable</a>                                  |
| 26 |                |     |                                                                           |
| 27 |                |     |                                                                           |

### Methods: Data collection, management, and analysis

|    |                 |     |                                                                                   |
|----|-----------------|-----|-----------------------------------------------------------------------------------|
| 28 |                 |     |                                                                                   |
| 29 |                 |     |                                                                                   |
| 30 | Data collection | 18a | Plans for assessment and collection of outcome, baseline, and other               |
| 31 | methods         |     | trial data, including any related processes to promote data quality (eg,          |
| 32 |                 |     | duplicate measurements, training of assessors) and a description of               |
| 33 |                 |     | study instruments (eg, questionnaires, laboratory tests) along with               |
| 34 |                 |     | their reliability and validity, if known. Reference to where data                 |
| 35 |                 |     | collection forms can be found, if not in the protocol <a href="#">page 8</a>      |
| 36 |                 |     |                                                                                   |
| 37 |                 |     |                                                                                   |
| 38 |                 | 18b | Plans to promote participant retention and complete follow-up,                    |
| 39 |                 |     | including list of any outcome data to be collected for participants who           |
| 40 |                 |     | discontinue or deviate from intervention protocols <a href="#">Supplemental</a>   |
| 41 |                 |     | <a href="#">Documents</a>                                                         |
| 42 |                 |     |                                                                                   |
| 43 | Data            | 19  | Plans for data entry, coding, security, and storage, including any                |
| 44 | management      |     | related processes to promote data quality (eg, double data entry;                 |
| 45 |                 |     | range checks for data values). Reference to where details of data                 |
| 46 |                 |     | management procedures can be found, if not in the protocol <a href="#">page 8</a> |
| 47 |                 |     |                                                                                   |
| 48 |                 |     |                                                                                   |
| 49 | Statistical     | 20a | Statistical methods for analysing primary and secondary outcomes.                 |
| 50 | methods         |     | Reference to where other details of the statistical analysis plan can be          |
| 51 |                 |     | found, if not in the protocol <a href="#">pages 9 and 10</a>                      |
| 52 |                 |     |                                                                                   |
| 53 |                 | 20b | Methods for any additional analyses (eg, subgroup and adjusted                    |
| 54 |                 |     | analyses) <a href="#">pages 9 and 10</a>                                          |
| 55 |                 |     |                                                                                   |
| 56 |                 |     |                                                                                   |
| 57 |                 | 20c | Definition of analysis population relating to protocol non-adherence              |
| 58 |                 |     | (eg, as randomised analysis), and any statistical methods to handle               |
| 59 |                 |     | missing data (eg, multiple imputation) <a href="#">page 9</a>                     |
| 60 |                 |     |                                                                                   |

## Methods: Monitoring

- 1  
2  
3  
4 Data monitoring 21a Composition of data monitoring committee (DMC); summary of its role  
5 and reporting structure; statement of whether it is independent from  
6 the sponsor and competing interests; and reference to where further  
7 details about its charter can be found, if not in the protocol.  
8 Alternatively, an explanation of why a DMC is not needed. **Page 10**  
9  
10  
11 21b Description of any interim analyses and stopping guidelines, including  
12 who will have access to these interim results and make the final  
13 decision to terminate the trial. **Page 10**  
14  
15 Harms 22 Plans for collecting, assessing, reporting, and managing solicited and  
16 spontaneously reported adverse events and other unintended effects  
17 of trial interventions or trial conduct. **Page 8**  
18  
19 Auditing 23 Frequency and procedures for auditing trial conduct, if any, and  
20 whether the process will be independent from investigators and the  
21 sponsor. **Page 8**  
22  
23

## Ethics and dissemination

- 24  
25  
26 Research ethics 24 Plans for seeking research ethics committee/institutional review board  
27 approval (REC/IRB) approval **page 11**  
28  
29 Protocol 25 Plans for communicating important protocol modifications (eg,  
30 amendments changes to eligibility criteria, outcomes, analyses) to relevant parties  
31 (eg, investigators, REC/IRBs, trial participants, trial registries, journals,  
32 regulators) **page 11**  
33  
34  
35 Consent or assent 26a Who will obtain informed consent or assent from potential trial  
36 participants or authorised surrogates, and how (see Item 32) **Page 4**  
37  
38 26b Additional consent provisions for collection and use of participant data  
39 and biological specimens in ancillary studies, if applicable **not**  
40 **applicable**  
41  
42  
43 Confidentiality 27 How personal information about potential and enrolled participants will  
44 be collected, shared, and maintained in order to protect confidentiality  
45 before, during, and after the trial. **Pages 8 and 11**  
46  
47 Declaration of 28 Financial and other competing interests for principal investigators for  
48 interests the overall trial and each study site. **Page 13**  
49  
50 Access to data 29 Statement of who will have access to the final trial dataset, and  
51 disclosure of contractual agreements that limit such access for  
52 investigators **page 13**  
53  
54  
55 Ancillary and 30 Provisions, if any, for ancillary and post-trial care, and for  
56 post-trial care compensation to those who suffer harm from trial participation. **not**  
57 **applicable**  
58  
59  
60

- 1  
2  
3  
4  
5  
6  
7  
8  
9  
10  
11  
12  
13  
14
- |                         |     |                                                                                                                                                                                                                                                                                                    |
|-------------------------|-----|----------------------------------------------------------------------------------------------------------------------------------------------------------------------------------------------------------------------------------------------------------------------------------------------------|
| Dissemination<br>policy | 31a | Plans for investigators and sponsor to communicate trial results to participants, healthcare professionals, the public, and other relevant groups (eg, via publication, reporting in results databases, or other data sharing arrangements), including any publication restrictions <b>page 12</b> |
|                         | 31b | Authorship eligibility guidelines and any intended use of professional writers <b>page 13</b>                                                                                                                                                                                                      |
|                         | 31c | Plans, if any, for granting public access to the full protocol, participant-level dataset, and statistical code <b>pages 13 and 14</b>                                                                                                                                                             |

## 15 Appendices

- 16  
17  
18  
19  
20  
21  
22  
23  
24
- |                               |    |                                                                                                                                                                                                                      |
|-------------------------------|----|----------------------------------------------------------------------------------------------------------------------------------------------------------------------------------------------------------------------|
| Informed consent<br>materials | 32 | Model consent form and other related documentation given to participants and authorised surrogates <b>Supplemental Documents</b>                                                                                     |
| Biological<br>specimens       | 33 | Plans for collection, laboratory evaluation, and storage of biological specimens for genetic or molecular analysis in the current trial and for future use in ancillary studies, if applicable <b>not applicable</b> |

---

25 \*It is strongly recommended that this checklist be read in conjunction with the SPIRIT 2013  
26 Explanation & Elaboration for important clarification on the items. Amendments to the  
27 protocol should be tracked and dated. The SPIRIT checklist is copyrighted by the SPIRIT  
28 Group under the Creative Commons "[Attribution-NonCommercial-NoDerivs 3.0 Unported](#)"  
29 license.  
30  
31  
32  
33  
34  
35  
36  
37  
38  
39  
40  
41  
42  
43  
44  
45  
46  
47  
48  
49  
50  
51  
52  
53  
54  
55  
56  
57  
58  
59  
60



1  
2  
3  
4  
5  
6  
7  
8  
9  
10  
11  
12  
13  
14  
15  
16  
17  
18  
19  
20  
21  
22  
23  
24  
25  
26  
27  
28  
29  
30  
31  
32  
33  
34  
35  
36  
37  
38  
39  
40  
41  
42  
43  
44  
45  
46  
47  
48  
49  
50  
51  
52  
53  
54  
55  
56  
57  
58  
59  
60

**Post discharge after surgery Virtual Care with Remote Automated Monitoring technology  
(PVC-RAM) versus standard care randomized controlled trial**

**PVC-RAM Investigators**

**Word count: 2428**

Confidential

## ABSTRACT

**Background:** After non-elective (i.e., semi-urgent, urgent, and emergent) surgeries, patients discharged from hospitals are at risk of re-admissions, emergency department visits, or death.

During the Coronavirus Disease 2019 (COVID-19) pandemic, we are undertaking a trial to determine if virtual care with remote automated monitoring (RAM) compared to standard care will increase days alive at home, in adults being discharged after non-elective surgery.

**Methods:** We will randomize 900 adults, being discharged after non-elective surgery, to virtual care with RAM or standard care, at 8 Canadian hospitals. Patients and health-care providers know treatment assignments. Outcome adjudicators are masked to treatment allocations. Patients in the experimental group learn how to use the tablet computer and RAM technology, which measures the following biophysical parameters: blood pressure, heart rate, respiratory rate, oxygen saturation, temperature, and weight. For 30 days, patients take daily biophysical measurements and complete a recovery survey. Patients interact with a virtual nurse daily on days 1-15 and every other day from days 16-30. Nurses escalate care to pre-assigned and available physicians if RAM measurements exceed predetermined thresholds, patients report specific symptoms (e.g., syncope), a medication error is identified, or nurses have concerns they cannot resolve. The primary outcome is days alive at home during the 30 days after randomization.

**Interpretation:** This trial will answer an important question informing how to manage surgical patients after discharge in the setting of the COVID-19 pandemic and offer insights for management of non-elective surgical patients in general.

**Trial Registration:** NCT04344665.

## INTRODUCTION

At the start of the Coronavirus Disease 2019 (COVID-19) pandemic, many hospitals cancelled elective surgeries for various reasons (e.g., reduce the risk of COVID-19 transmission, facilitate physical distancing, preserve personal protection equipment, and maximize bed availability for patients with COVID-19); however, throughout the pandemic, the need for semi-urgent (e.g., oncology), urgent (e.g., hip fracture), and emergent (e.g., abdominal aortic aneurysm rupture) surgeries remained. Patients discharged after non-elective (i.e., semi-urgent, urgent, or emergent) surgeries are at substantial risk of hospital re-admissions, presentation to emergency departments or urgent-care centres, or death in the 30 days following discharge.<sup>1-3</sup> Many centres are now resuming elective surgeries. To facilitate management of the backlog of individuals waiting for elective surgeries, ensure hospital capacity for patients with COVID-19, and minimize the spread of COVID-19, there is a need to reduce non-elective surgical patients' subsequent use of acute-hospital care.

A strong rationale and encouraging evidence suggests that virtual care with remote automated monitoring (RAM) will increase days alive at home, in adults discharged after surgery.<sup>4</sup> We are undertaking the Post discharge after surgery Virtual Care with Remote Automated Monitoring technology (PVC-RAM) Trial to address the following question: among adults discharged after non-elective surgery, does virtual care with RAM increase days alive at home during the first 30 days after randomization, compared to standard care?

## METHODS

### Design and setting

1  
2  
3 The PVC-RAM trial is a multicentre, parallel-group, superiority, randomized controlled  
4 trial (RCT) of 900 patients being discharged from the hospital after non-elective surgery. PVC-  
5 RAM will determine the effects of virtual care with RAM compared to standard care. Eight,  
6  
7  
8 Canadian, academic, tertiary-care hospitals are participating, Table 1.  
9  
10  
11  
12  
13

### 14 **Trial population**

15  
16 We are including patients who: 1. are  $\geq 40$  years of age; 2. have undergone same-day or  
17 inpatient non-elective surgery and are being discharged home or are within 24 hours after  
18  
19 discharge home, as long as they have not had acute-hospital care since discharge; and 3. provide  
20 informed consent to participate. Table 2 reports the exclusion criteria. Patients with COVID-19  
21  
22 are not excluded from the trial.  
23  
24  
25  
26  
27  
28  
29  
30

### 31 **Patient recruitment**

32  
33 The first patient was randomized on April 23, 2020. Study personnel are using efficient  
34 recruitment strategies previously utilized in perioperative trials.<sup>5,6</sup> These include identifying  
35 eligible patients through screening of daily surgical lists in the operating room, surgical wards,  
36  
37 and intensive care units. Investigators ask clinicians working in anesthesiology, surgery, and  
38  
39 medicine to contact the study personnel regarding patients who have undergone non-elective  
40  
41 surgery. Research personnel approach eligible patients after surgery to obtain written informed  
42  
43 consent, Supplemental Appendix. Study personnel can obtain consent via the telephone, if the  
44  
45 patient has already been discharged home and they are within 24 hours of discharge.  
46  
47  
48  
49  
50  
51  
52  
53

### 54 **Randomization and blinding**

1  
2  
3 Randomization occurs when a patient is deemed eligible and informed consent is  
4  
5 obtained. Patients are only randomized after the most responsible physician has decided to  
6  
7 discharge the patient home. Although our goal is to randomize patients before hospital  
8  
9 discharge, some patients may be discharged before study personnel can randomize the patient.  
10  
11

12 Research personnel randomize patients via an Interactive Web Randomization System.  
13  
14 This 24-hour computerized randomization internet system is maintained at the Population Health  
15  
16 Research Institute (PHRI), which is part of Hamilton Health Sciences and McMaster University  
17  
18 in Hamilton, Ontario, Canada. The randomization procedure ensures allocation concealment.  
19  
20

21 The randomization process uses block randomization stratified by centre and type of  
22  
23 surgery (i.e., cardiac versus non-cardiac). We use randomly varying block sizes, and study  
24  
25 personnel and investigators do not know the block sizes. We randomize patients in a 1:1 fashion  
26  
27 to receive virtual care with RAM or standard care. Patients, healthcare providers, and data  
28  
29 collectors are aware of patients' treatment assignment. Outcome adjudicators are masked to  
30  
31 treatment allocation.  
32  
33  
34  
35  
36  
37  
38  
39

### 40 **Trial interventions**

41 Patients are randomized to virtual care with RAM for 30 days after randomization or  
42  
43 standard care. Research staff teach patients allocated to virtual care with RAM how to use the  
44  
45 cellular, modem-enabled, tablet computer and RAM technology from Cloud DX, Figure 1. This  
46  
47 RAM technology will measure the following biophysical parameters: blood pressure, heart rate,  
48  
49 respiratory rate, oxygen saturation, temperature, and weight. Daily for 30 days, patients take  
50  
51 biophysical measurements and complete a recovery survey, and nurses review these results,  
52  
53 Supplemental Appendix.  
54  
55  
56  
57  
58  
59  
60

1  
2  
3 Patients interact daily with a virtual nurse (i.e., a nurse via the tablet computer) on days  
4  
5 1-15 after randomization and every other day from days 16-30. On days without planned virtual  
6  
7 visits, nurses organize unscheduled virtual visits if patients' biophysical measurements or  
8  
9 recovery survey responses exceed predetermined thresholds or the nurse identifies another  
10  
11 reason for concern.  
12  
13

14  
15 During virtual visits, nurses discuss any patient symptoms, evaluate their wound and  
16  
17 obtain a picture, reinforce principles related to recovery after surgery and the need for physical  
18  
19 distancing, and undertake medication review and reconciliation on days 1, 8, 15, 22, and 30 after  
20  
21 randomization. Virtual nurses escalate care to pre-assigned and available physicians (i.e.,  
22  
23 perioperative physicians or surgeons) if patients' RAM measurements exceed predetermined  
24  
25 thresholds, patients report specific symptoms (e.g., syncope), drug errors are identified, or virtual  
26  
27 nurses have concerns about patients' health that they cannot resolve. Physicians will add or  
28  
29 modify treatments as indicated and, if required, have patients come to an outpatient facility for  
30  
31 evaluation or management. Patients have access to a nurse or physician 24 hours a day, 7 days  
32  
33 per week.  
34  
35  
36  
37

38 In the standard-care group, patients receive post hospital management as per the standard  
39  
40 of care at the hospital in which they underwent surgery. No changes to surgeons' standard of  
41  
42 care regarding post discharge management occurs for patients randomized to the standard-care  
43  
44 group, as a result of the trial.  
45  
46  
47  
48

### 49 **Trial outcomes**

50  
51 The primary outcome is days alive at home during the first 30 days after randomization.  
52  
53 Secondary outcomes during the first 30 days after randomization include: 1. hospital re-  
54  
55  
56  
57

1  
2  
3 admission; 2. emergency department visit; 3. urgent-care centre visit; 4. acute-hospital care; 5.  
4  
5 brief acute-hospital care; 6. all-cause hospital days; 7. COVID-19 infection; 8. medication error  
6  
7 detection; 9. medication error correction; 10. delirium; 11. surgeon, family physician, or  
8  
9 specialist in-person clinic visit; 12. surgeon, family physician, or specialist virtual clinic visit; 13.  
10  
11 sepsis; 14. acute heart failure; and 15. death. An additional secondary outcome is pain, assessed  
12  
13 at days 7, 15, and 30 and 6 months after randomization. Tertiary outcomes and outcome  
14  
15 definitions are reported in the Supplemental Appendix. We hypothesize that virtual care with  
16  
17 RAM will improve the primary, secondary, and tertiary outcomes. We expect to detect more  
18  
19 medication errors in the intervention group compared to the control group and would interpret  
20  
21 this as an improvement in care.  
22  
23  
24  
25  
26  
27

## 28 **Follow-up**

29  
30  
31 The day of randomization is day 0 of follow-up and the day after randomization is day 1  
32  
33 of follow-up after randomization, etc. Because patients are followed from the day of  
34  
35 randomization (i.e., day 0 of follow-up) until day 30 after randomization, patients have 31 days  
36  
37 of follow-up. Study personnel will contact all study patients at 31 days and 6 months after  
38  
39 randomization and collect data on the following outcomes: 1. days alive at home; 2. hospital re-  
40  
41 admission; 3. emergency department visit; 4. urgent-care centre visit; 5. all-cause hospital days;  
42  
43 6. delirium; 7. sepsis; 8. acute heart failure; 9. death; 10. patient-level cost of recovery; 11.  
44  
45 arrhythmia resulting in electrical cardioversion; 12. acute renal failure resulting in dialysis; 13.  
46  
47 respiratory failure; 14. infection; 15. surgical site infection; 16. life-threatening, major, or  
48  
49 critical-organ bleeding; 17. ileus; 18. myocardial infarction; 19. clinically important atrial  
50  
51 fibrillation; 20. symptomatic proximal venous thrombo-embolism; 21. stroke; 22. non-fatal  
52  
53  
54  
55  
56  
57  
58  
59  
60

1  
2  
3 cardiac arrest; 23. clostridium difficile-associated diarrhea; and 24. indwelling device  
4  
5 inappropriately left in patient. Study personnel contact patients in the standard-care group and  
6  
7 collect data on the following outcomes: 1. Brief Pain Inventory-Short Form (BPI-SF) on days 7,  
8  
9 15, and 30 and 6 months after randomization; and 2. medication error detection and medication  
10  
11 error corrections on day 31 after randomization.  
12  
13

14  
15 For patients in the virtual care and RAM group, virtual nurses will collect data on the  
16  
17 following outcomes: 1. medication error detection; 2. medication error corrections; and 3. the  
18  
19 BPI-SF. Through the Institute for Clinical Evaluative Sciences (ICES) and the Canadian  
20  
21 Institute of Health Information (CIHI), we will collect data on the following outcomes up to 6  
22  
23 months after randomization: 1. acute-hospital care; 2. COVID-19 infection; 3. re-operation; 4.  
24  
25 surgeon, family physician, or specialist clinic visit; and 5. health services utilization-related  
26  
27 costs.  
28  
29  
30  
31  
32

### 33 **Data Management**

34  
35 Study personnel and virtual nurses record data on Case Report Forms (CRFs) and submit  
36  
37 the CRFs through a secure computerized database (i.e., iDataFax) via the internet. Patients are  
38  
39 identified using a unique numeric code and all patient data are anonymized to ensure  
40  
41 confidentiality. Data validity checks are preprogrammed in the database and are monitored by  
42  
43 data management assistants from the Project Office through multi-level data validation of CRFs.  
44  
45  
46  
47  
48

### 49 **Sample size**

50  
51 Table 3 reports the trial power based on a 2-sided  $\alpha=0.05$  and a sample size of 450  
52  
53 patients in each treatment group. We expect patients in the control group to have on average  
54  
55  
56  
57



1  
2  
3 29.60 days alive at home, of 31 potential days. If on average virtual care with RAM results in  
4  
5 29.81 days alive at home, we will have 89% power. For other possible estimates of days alive at  
6  
7 home in the control group (i.e., 29.40, 29.50, 29.60), for absolute increases of 0.21 to 0.30 days  
8  
9 alive at home in the intervention group, we have 89%-99% power.  
10  
11  
12  
13

### 14 **Statistical analyses**

15  
16  
17 Following the intention-to-treat principle, we will analyze patients in the treatment  
18  
19 groups to which they were randomized. The Operations Committee will create a separate  
20  
21 statistical analysis plan (SAP) that the statistical analyses will follow. The SAP will be finalized  
22  
23 before any investigator is unblinded to the trial results.  
24  
25  
26  
27

### 28 ***Main analyses***

29  
30  
31 For the primary analysis, we will use Poisson regression to estimate the 31-day effect of  
32  
33 virtual care and RAM technology compared with standard care on the primary outcome of days  
34  
35 alive at home, with stratification by centre and type of surgery. For the primary outcome, we  
36  
37 will use the Mann-Whitney-Wilcoxon test to establish the p value. We will infer statistical  
38  
39 significance if the computed 2-sided p-value is less than  $\alpha=0.05$ .  
40  
41

42 For the binary secondary and tertiary outcomes, we will compare the effect of virtual care  
43  
44 and RAM technology using modified Poisson regression,<sup>7</sup> and we will report the corresponding  
45  
46 relative risk reductions or increases and 95% CIs. For continuous outcomes, we will evaluate  
47  
48 treatment effects using the regression approach to fitting the analysis of co-variance (ANCOVA)  
49  
50 models, so we can obtain estimates and their 95% CIs for the independent variables. We will  
51  
52  
53  
54  
55  
56  
57

1  
2  
3 also conduct economic analyses to assess the cost-impact and cost-effectiveness of virtual care  
4 with RAM.  
5  
6  
7  
8  
9

### 10 ***Interim Analyses***

11  
12 Two interim analyses based on the primary outcome will occur when 50% and 75% of  
13 the patients have been followed for 30 days after randomization. The Data Monitoring  
14 Committee (DMC) will use the modified Haybittle-Peto rule of 4 standard deviations (SDs) ( $\alpha =$   
15 0.00006) for the first planned interim analysis and 3.5 SDs ( $\alpha = 0.00047$ ) for the second planned  
16 interim analysis. For a finding of the treatment to be considered significant, these predefined  
17 boundaries will have to be exceeded in at least 2 consecutive analyses, 2 or more months apart.  
18 The  $\alpha$ -level for the final analysis will remain at the conventional  $\alpha = 0.05$  given the infrequent  
19 interim analyses, their extremely low  $\alpha$ -levels, and the requirement for confirmation with  
20 subsequent analyses.  
21  
22  
23  
24  
25  
26  
27  
28  
29  
30  
31  
32

33 At any time during the trial, if safety concerns arise the DMC chairperson will assemble a  
34 formal meeting of the full committee. The DMC will make their recommendations to the Project  
35 Office Operations Committee after considering all available trial data and any external data from  
36 relevant studies. If a recommendation for termination is being considered, the DMC will invite  
37 the Operations Committee to explore all possibilities before a decision is made. A detailed  
38 charter has been developed and governs the activities of the DMC. The DMC members have  
39 expertise in clinical trials, perioperative medicine, and biostatistics.  
40  
41  
42  
43  
44  
45  
46  
47  
48  
49  
50

### 51 **Trial organization**

1  
2  
3 The PHRI is the sponsor and coordinating centre for this trial and is primarily responsible  
4 for the organization of the trial, development of the randomization scheme, the study database,  
5 data consistency checks, data analysis, and coordination of the study centres. The trial structure  
6 includes the following groups: Project Office, Operations Committee, Steering Committee, Site  
7 Principal Investigators, Investigators, and Adjudication Committee.  
8  
9  
10  
11  
12  
13  
14  
15  
16

### 17 **Patient and public involvement**

18  
19 A panel of four patient partners reviewed the daily symptom survey for clarity and  
20 perceived ease of use. Given rules on social distancing and limitations to in-person meetings, all  
21 feedback was provided via email. We will conduct semi-structured interviews to understand the  
22 experience of the PVC-RAM intervention.<sup>8,9</sup> Interview questions will focus on the recovery  
23 experience through PVC-RAM, compared to having experienced surgical recovery in the past  
24 (patients, family), or compared to caring for surgical patients previously (nurses, physicians).  
25 Inductive thematic analysis will be used to code and analyze these data, with NVivo used to  
26 facilitate analysis.<sup>10</sup> We plan to interview up to 20 nurses, 20 physicians, and 20  
27 patients/families but will cease once data saturation is reached.<sup>11</sup>  
28  
29  
30  
31  
32  
33  
34  
35  
36  
37  
38  
39  
40  
41

### 42 **ETHICS AND DISSEMINATION**

43  
44 We require documentation of research ethics committee or institutional review board  
45 (REC/IRB) approvals before sites are activated to enroll patients. Investigators are informed of  
46 protocol amendments, and REC/IRBs are requested to approve them. Research personnel obtain  
47 written informed consent for each patient before randomization. Data are stored on a central  
48 encrypted, high-security computer system and kept strictly confidential.  
49  
50  
51  
52  
53  
54  
55  
56  
57  
58  
59  
60

1  
2  
3  
4  
5  
6  
7  
8  
9  
10  
11  
12  
13  
14  
15  
16  
17  
18  
19  
20  
21  
22  
23  
24  
25  
26  
27  
28  
29  
30  
31  
32  
33  
34  
35  
36  
37  
38  
39  
40  
41  
42  
43  
44  
45  
46  
47  
48  
49  
50  
51  
52  
53  
54  
55  
56  
57  
58  
59  
60

Planned knowledge translation activities are: a) Elsevier will develop an integrated, online, multimedia resource centre as a platform for large scale dissemination of knowledge gleaned from PVC-RAM; this will include multimedia slide and audio programs, patient testimonial interviews, and fact sheets; b) policy brief, supporting evidence-informed transformations at all levels of the health system, which includes a synthesis of research and systematic reviews; c) presentation at national and international conferences; d) peer reviewed journal publications; and e) public relations with national coverage through a high-impact media release of the trial results.

## DISCUSSION

Hospitals need to facilitate management of the backlog of patients waiting for elective surgery, ensure hospital capacity for patients with COVID-19, and minimize the spread of COVID-19. Hospitals have a continuing obligation to treat non-COVID-19 patients with semi-urgent, urgent, or emergent conditions. Post discharge after non-elective surgery, these patients are at high risk (i.e., 15-25%) of needing subsequent acute-hospital care and mortality.<sup>1-3</sup> A strong rationale and promising data suggest that virtual care with RAM technology can increase days alive at home, among adults discharged after undergoing non-elective surgery. The PVC-RAM trial will answer an important question that will inform how to manage surgical patients after discharge in the setting of a pandemic and beyond, and offer insights for management of non-elective surgical patients in general.

**WRITING COMMITTEE:** Michael H. McGillion, RN, PhD,<sup>1,2</sup> Joel Parlow, MD, MSc,<sup>3,4</sup> Flavia K. Borges, MD, PhD,<sup>2,5</sup> Maura Marcucci, MD, MSc,<sup>5,6</sup> Michael Jacka, MD, MSc,<sup>7</sup> Anthony Adili, MD,<sup>8,9</sup> Manoj M. Lalu, MD,<sup>10,11</sup> Homer Yang, MD,<sup>12,13</sup> Ameen Patel MD,<sup>5,14</sup> Susan O’Leary, MD,<sup>14,15</sup> Vikas Tandon, MD,<sup>5,9</sup> Gavin M. Hamilton, MD, MSc,<sup>10,11</sup> Marko Mrkobrada, MD, MSc,<sup>16</sup> Carley Ouellette, RN, MSc,<sup>1,14</sup> Marissa Bird, BSN, RN,<sup>1</sup> Sandra Ofori, MD,<sup>17</sup> David Conen, MD, MPH,<sup>2,5</sup> Pavel S. Roshanov, MD, MSc,<sup>16</sup> Valerie Harvey, BSc,<sup>2</sup> Gordon H. Guyatt, MD, PhD,<sup>5,6</sup> Yannick Le Manach, MD, PhD,<sup>2,15</sup> Shrikant I. Bangdiwala, PhD,<sup>2,6</sup> Ramiro Arellano, MD, MSc,<sup>3,4</sup> Ted Scott, PhD,<sup>14</sup> Jennifer Lounsbury, RN(EC), MN,<sup>1,14</sup> Dylan A. Taylor, MD,<sup>18</sup> Rahima Nenshi, MD, MSc,<sup>8,9</sup> Alan J. Forster, MD, MSc,<sup>11,19</sup> Mahesh Nagappa, MD,<sup>12,13</sup> Andre Lamy, MD, MHSc,<sup>2,14</sup> Elizabeth Peter, PhD, RN,<sup>20</sup> Kelsea Levesque, BScN, RN,<sup>1</sup> Kristen Marosi, MD,<sup>21</sup> Sultan Chaudhry, MD,<sup>5</sup> Shariq Haider, MD,<sup>5</sup> Lesly Deuchar, MN,<sup>23</sup> Brandi LeBlanc, RN,<sup>9</sup> Colin J.L McCartney, MBChB, PhD,<sup>10</sup> Emil H. Schemitsch, MD,<sup>23</sup> Jessica Vincent, MSc,<sup>2</sup> Shirley M. Pettit, RN,<sup>14</sup> James Paul, MD, MSc,<sup>15</sup> Deborah DuMerton, RN,<sup>4</sup> Angela Djuric Paulin, RN,<sup>14</sup> Marko Simunovic, MD, MPH,<sup>8</sup> David C. Williams, MD, MSc,<sup>24</sup> Samantha Halman, MD, MMED,<sup>11,19</sup> Christopher M. Schlacta, MDCM,<sup>23</sup> Jessica Shelley, RN, BScN,<sup>4</sup> John Harlock, MD,<sup>8</sup> Ralph M. Meyer, MD,<sup>14,25</sup> Michelle Graham, MD,<sup>18</sup> Harsha Shanthanna, MD, PhD,<sup>15</sup> Neil Parry, MD,<sup>23</sup> David R. Pichora, MD,<sup>26</sup> Haroon Yousef, MD, MHSc,<sup>5</sup> Husein Moloo, MD, MSc<sup>11,27</sup> Herman Sehmbi, MBBS, MD,<sup>12,13</sup> Melissa Waggott, RN, MScN,<sup>28</sup> Emilie P. Belley-Cote, MD, PhD,<sup>2,5</sup> Richard Whitlock, MD, PhD,<sup>2,6</sup> PJ Devereaux, MD, PhD,<sup>2,6</sup>

1. School of Nursing, McMaster University, Hamilton, Ontario, Canada
2. Population Health Research Institute, Hamilton, Ontario, Canada

- 1  
2  
3 3. Department of Anesthesiology and Perioperative Medicine, Queen's University,  
4  
5 Kingston, Ontario, Canada  
6
- 7  
8 4. Department of Anesthesiology and Perioperative Medicine, Kingston Health Sciences  
9  
10 Centre, Kingston, Ontario, Canada  
11
- 12 5. Department of Medicine, McMaster University, Hamilton, Ontario, Canada  
13
- 14 6. Department of Health Research Methods, Evidence, and Impact, McMaster University,  
15  
16 Hamilton, Ontario, Canada  
17
- 18 7. Departments of Critical Care and Anesthesiology, University of Alberta, Edmonton,  
19  
20 Alberta, Canada  
21
- 22 8. Department of Surgery, McMaster University, Hamilton, Ontario, Canada  
23
- 24 9. St. Joseph's Healthcare Hamilton, Hamilton, Ontario, Canada  
25
- 26 10. Department of Anesthesiology and Pain Medicine, The University of Ottawa and The  
27  
28 Ottawa Hospital, Ottawa, Ontario, Canada  
29
- 30 11. The Ottawa Hospital Research Institute, Ottawa, Ontario, Canada  
31
- 32 12. Department of Anesthesia & Perioperative Medicine, Schulich School of Medicine,  
33  
34 University of Western Ontario, London, Ontario, Canada  
35
- 36 13. Department of Anesthesia & Perioperative Medicine, London Health Sciences Centre,  
37  
38 London, Ontario, Canada  
39
- 40 14. Hamilton Health Sciences, Hamilton, Ontario, Canada  
41
- 42 15. Department of Anesthesia, McMaster University, Hamilton, Ontario, Canada  
43  
44
- 45 16. Department of Medicine, Schulich School of Medicine, University of Western Ontario,  
46  
47 London, Ontario, Canada  
48  
49  
50  
51  
52  
53  
54  
55  
56  
57

17. Department of Internal Medicine, University of Port Harcourt, Port Harcourt, Nigeria, West Africa.
18. Department of Medicine, University of Alberta, Edmonton, Alberta, Canada
19. Department of Medicine, The University of Ottawa and The Ottawa Hospital, Ottawa, Ontario, Canada
20. Lawrence S. Bloomberg Faculty of Nursing, University of Toronto, Toronto, Ontario, Canada
21. Department of Medicine, Queen's University, Kingston, Ontario, Canada
22. Alberta Health Services, Alberta, Canada
23. Department of Surgery, University of Western Ontario and London Health Sciences Centre, London, Ontario, Canada
24. Department of Surgery, University of Alberta, Edmonton, Alberta, Canada
25. Department of Oncology, McMaster University, Hamilton, Ontario, Canada
26. Department of Surgery, Queen's University and Kingston Health Sciences Centre, Kingston, Ontario, Canada
27. Department of Surgery, The University of Ottawa and The Ottawa Hospital, Ottawa, Ontario, Canada
28. The Ottawa Hospital, Ottawa, Ontario, Canada

**CONTRIBUTIONS:** MHM, JP, FKB, MM, MJ, AA, MML, HY, AP, SOL, VT, GMH, MMr, CO, MB, SOf, DC, PSR, VH, GHG, YLM, SIB, TS, JL, RN, AL, EP, SC, SH, LD, JV, SP, DD, MS, JH, HS, HY, and PJD planned the conceptualisation and the design of the study and the

1  
2  
3 protocol. All members of the writing committee contributed to critical revisions of the current  
4  
5 manuscript and approved the manuscript for submission.  
6  
7  
8  
9

10 **FUNDING:** This trial is supported by the following grants: Roche Innovation Challenge  
11  
12 Application Grant; McMaster COVID-19 Research Fund Grant; The Research Institute of St.  
13  
14 Joseph's Healthcare Hamilton Grant; COVID-19 Innovation funding grant from the Ottawa  
15  
16 Hospital Academic Medical Association (TOHAMO); and Queen's University Department of  
17  
18 Anaesthesiology Award and Department of Medicine Research Award to help fund the trial at  
19  
20 Kingston Health Sciences. This trial received in-kind support to cover the salaries of the virtual  
21  
22 nurses from the Hamilton Health Sciences, Kingston Health Sciences, London Health Sciences,  
23  
24 St. Joseph's Healthcare Hamilton, the Ottawa Hospital, and the University of Alberta Hospital.  
25  
26 MHM holds the Heart and Stroke Foundation/Michael G. DeGroot Endowed Chair in  
27  
28 Cardiovascular Nursing. CO and SO received internship funding from Mitacs Accelerate to  
29  
30 support work on the PVC-RAM Trial. FKB and MM hold McMaster University Department of  
31  
32 Medicine Career Research Awards. DC holds a McMaster University Department of Medicine  
33  
34 Mid-Career Research Award. PJD holds the McMaster University / Hamilton Health Sciences  
35  
36 Chair in Perioperative Care and a Tier 1 Canada Research Chair in Perioperative Medicine.  
37  
38  
39  
40  
41  
42  
43

44 **DISCLAIMER:** The members of the writing committee are solely responsible for the trial  
45  
46 design, conduct, management, analyses, data interpretation, writing of this paper, and decision to  
47  
48 submit this paper for publication.  
49  
50  
51  
52

53 **COMPETING INTERESTS:** CloudDX undertook training sessions for virtual nurses and  
54  
55 perioperative physicians and surgeons regarding how to use their technology. DC received  
56  
57



1  
2  
3 consultation fees from Servier, Canada, outside of the current work. EPBC has received grants  
4  
5 from Roche and Bayer. PJD has received grants from Philips' Healthcare and Covidien.  
6  
7  
8  
9

10 **Data Sharing Statement:** The Population Health Research Institute (PHRI) is the sponsor of  
11  
12 this trial. The PHRI believes the dissemination of clinical research results is vital and sharing of  
13  
14 data is important. PHRI prioritizes access to data analyses to researchers who have worked on  
15  
16 the trial for a significant duration, have played substantial roles, and have participated in raising  
17  
18 the funds to conduct the trial. PHRI balances the length of the research study, and the  
19  
20 intellectual and financial investments that made it possible with the need to allow wider access to  
21  
22 the data collected. Data will be disclosed only upon request and approval of the proposed use of  
23  
24 the data by a Review Committee. Data are available to the journal for evaluation of reported  
25  
26 analyses. Data requests from other non-PVC-RAM investigators will not be considered until 5  
27  
28 years after the close out of the trial. Regarding the ICES data, while data sharing agreements  
29  
30 prohibit ICES from making the data set publicly available, access can be granted to those who  
31  
32 meet prespecified criteria for confidential access, available at [www.ices.on.ca/DAS](http://www.ices.on.ca/DAS).  
33  
34  
35  
36  
37  
38  
39

40 **Dedication:** We dedicate this paper to the memory of Dr. Yannick Le Manach, who was a  
41  
42 colleague and PVC-RAM investigator. Yannick was a brilliant biostatistician, clinical  
43  
44 epidemiologist, and anesthesiologist. Unfortunately, depression cut his life short. His tragic loss  
45  
46 highlights the need for more trials to inform how to better prevent and manage depression and  
47  
48 suicide.  
49  
50  
51  
52  
53  
54  
55  
56  
57  
58  
59  
60

**REFERENCES**

1. All-cause readmission to acute care and return to the emergency department: Canadian Institutes of Health Information; 2012.
2. Glance LG, Kellermann AL, Osler TM, et al. Hospital readmission after noncardiac surgery: the role of major complications. *JAMA Surg* 2014;149:439-45.
3. Vascular Events in Noncardiac Surgery Patients Cohort Evaluation Study I. Association between complications and death within 30 days after noncardiac surgery. *CMAJ* 2019;191:E830-E7.
4. Yang H, Dervin G, Madden S, et al. Postoperative home monitoring after joint replacement: Retrospective outcome study comparing cases with matched historical controls. *JMIR Perioper Med* 2018;2.
5. Devereaux PJ, Yang H, Yusuf S, et al. Effects of extended-release metoprolol succinate in patients undergoing non-cardiac surgery (POISE trial): a randomised controlled trial. *Lancet* 2008;371:1839-47.
6. Devereaux PJ, Mrkobrada M, Sessler DI, et al. Aspirin in patients undergoing noncardiac surgery. *N Engl J Med* 2014;370:1494-503.
7. Zou G. A modified poisson regression approach to prospective studies with binary data. *Am J Epidemiol* 2004;159:702-6.
8. Bradshaw C, Atkinson S, Doody O. Employing a Qualitative Description Approach in Health Care Research. *Glob Qual Nurs Res* 2017;4:1-8.
9. Sandelowski M. Whatever happened to qualitative description? *Res Nurs Health* 2000;23:334-40.

- 1  
2  
3 10. Braun V, Clarke V. Using thematic analysis in psychology. *Qualitative research in*  
4 *Psychology* 2006;3:77-101.  
5  
6  
7 11. Marshall B, Cardon P, Poddar A, Fontenot R. Does sample size matter in qualitative  
8 research? A review of qualitative interviews in IS research. *Journal of Computer Information*  
9 *Systems* 2013;54:11-22.  
10  
11  
12  
13  
14  
15  
16  
17  
18  
19  
20  
21  
22  
23  
24  
25  
26  
27  
28  
29  
30  
31  
32  
33  
34  
35  
36  
37  
38  
39  
40  
41  
42  
43  
44  
45  
46  
47  
48  
49  
50  
51  
52  
53  
54  
55  
56  
57  
58  
59  
60

Confidential

**Table 1. Canadian hospitals participating in the PVC-RAM trial**

| <b>Hospital</b>                                                 | <b>City, Province</b> |
|-----------------------------------------------------------------|-----------------------|
| Hamilton Health Sciences, Hamilton General Hospital             | Hamilton, Ontario     |
| Hamilton Health Sciences, Juravinski Hospital and Cancer Centre | Hamilton, Ontario     |
| Kingston Health Sciences                                        | Kingston, Ontario     |
| London Health Sciences, Victoria Hospital                       | London, Ontario       |
| London Health Sciences, University Hospital                     | London, Ontario       |
| St. Joseph's Healthcare Hamilton                                | Hamilton, Ontario     |
| The Ottawa Hospital                                             | Ottawa, Ontario       |
| University of Alberta Hospital                                  | Edmonton, Alberta     |

**Table 2. Patients fulfilling any of the following criteria are excluded**

---

underwent same-day surgery and the surgeon or anesthesiologist believe the case reflects a traditional same-day surgery case with a low likelihood of needing acute-hospital care;

---

went to rehabilitation or convalescent care for more than 7 days after undergoing surgery;

---

are unable to communicate with research staff, complete study surveys, or undertake an interview using a tablet computer due to a cognitive, language, visual, or hearing impairment; or

---

reside in an area without cellular network coverage and no home Wi-Fi.

---

Confidential

1  
2  
3  
4  
5  
6  
7  
8  
9  
10  
11  
12  
13  
14  
15  
16  
17  
18  
19  
20  
21  
22  
23  
24  
25  
26  
27  
28  
29  
30  
31  
32  
33  
34  
35  
36  
37  
38  
39  
40  
41  
42  
43  
44  
45  
46  
47  
48  
49  
50  
51  
52  
53  
54  
55  
56  
57  
58  
59  
60

**Table 3. Power using 2-sided  $\alpha=0.05$ , with 450 subjects per arm**

| Control group<br>Days alive at home | Virtual Care with RAM<br>Days alive at home | Power |
|-------------------------------------|---------------------------------------------|-------|
| 29.40                               | 29.61                                       | 89%   |
| 29.40                               | 29.69                                       | 99%   |
| 29.50                               | 29.71                                       | 89%   |
| 29.50                               | 29.80                                       | 99%   |
| 29.60                               | 29.81                                       | 89%   |
| 29.60                               | 29.90                                       | 99%   |

Confidential

Figure 1. Cloud DX Connected Health kit

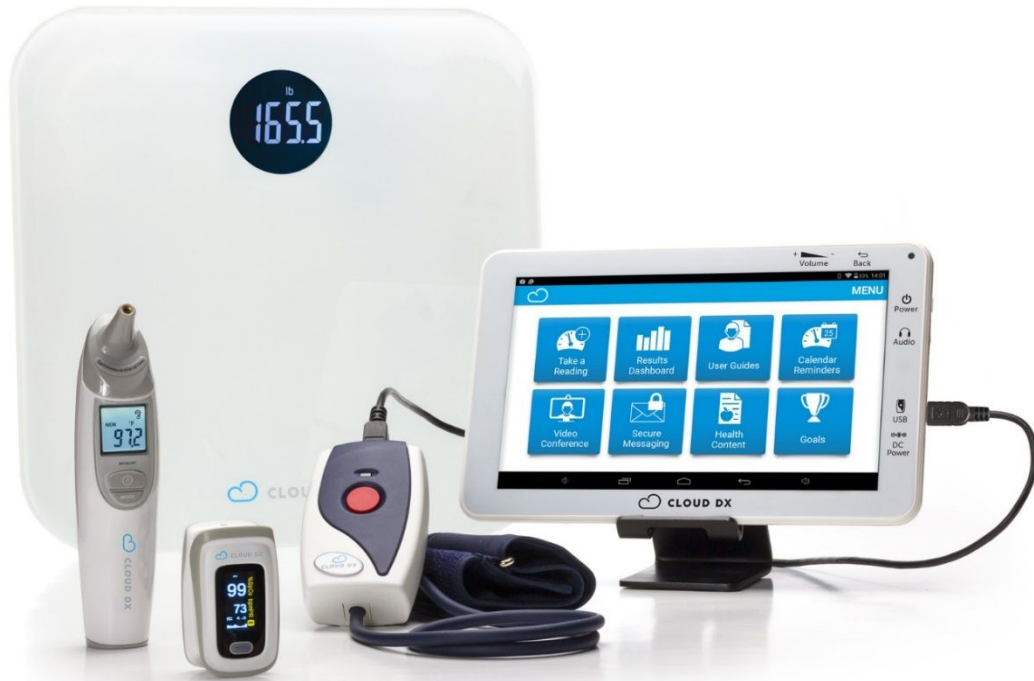

**SUPPLEMENTARY DOCUMENTS**

**Supplementary Table of Contents**

1. Supplemental Trial Groups and Investigators

Participating Centres and Investigators – page 2

Population Health Research Institute Coordinating Centre – page 2

Event Adjudication Committee – page 2

Data Monitoring Committee – page 2

2. Supplemental Appendices

Appendix 1. Sample consent form – pages 3 to 12

Appendix 2. Biophysical measurements and recovery survey – page 13

Appendix 3. Tertiary outcomes – page 14

Appendix 4. Outcome definitions – pages 15 to 22



## Supplemental Trial Groups and Investigators

**Participating centres and investigators** – *Kingston Health Sciences*: Darrin Payne, Rachael DaCunha, Sunil Patel, Michael Yacob, Siddhartha Srivastava, Lisa Nguyen, Curtis Nickel, Tyler Hands, Elorm Vowotor, Emile Peponoulas, Angela Webster, Tammy Doyle; *Hamilton Health Sciences, Hamilton General Hospital*: Kajenny Srivaratharajah, Dave Szalay, Deborah Bedini, Victor Chu, Jason Busse, Sandra Carroll, Jeremy Petch, Duane Bender, Dina Brooks, Krysten Gregus, Patricia Power, Dale Williams; *Hamilton Health Sciences, Juravinski Hospital and Cancer Centre*: Amitabha Chakroborty, Samir Raza, Amna Ahmed, Kelly Lawrence, Derek Hunt, David Cowan, Jehonathan Pinthus, David Wilson, Clare Reade, Leslie Gauthier, Stephen Kelly, Kirsten Krull, Kim Alvarado, Susan Reid, Mohit Bhandari; *University of Alberta Hospital*: Derek Dillane, James Greene, David Bigam, Ryan Snelgrove, Brian Buchanan, Oleksa Rewa, Ronald Brisebois, Nadr Jomha, Bruce Ritchie, Sherry Reid, Adrian Fairey, Greg Hrynchyshyn; *St. Joseph's Healthcare Hamilton*: Bobby Shayegan, Christian Finley, Wendy Lim, Maria Tiboni, David Choi, Anne-Marie MacDonald, Deanna Burnette, Tom Stewart, Melissa Farrell, Carolyn Goss, Faraaz Quiraishi; *The Ottawa Hospital*: Daniel McIsaac, Sarah Tierney, Shawn Hicks, Kathryn Wheeler, Josh Robert, Colleen McFaul, Greg Krolczyk, Purnima Rao, Stephane Moffett, Dan Dubois, Catherine Code, Heather Clark, Melissa Rousseau, Catherine Gray, Dominique Yelle, Youssef Tawil, Babak Rashidi, Weiwei Beckerleg, Shipa Gupta, Sudhir Sundaresan, Suzanne Madore, Andrew Seely, Reece Bearnese, Dean Fergusson, Susan Madden, Jad Abou Khalil, John Sinclair, Moein Momtazi, Rodney Breau, Humberto Vigil, James Chan; *London Health Sciences (University and Victoria Hospitals)*: George Nicolaou, Yamini Subramani, Ashraf Fayad, Amit Garg, Cathy Vandersluis, Glen Kearns, Cheryl Churcher, Carla Cormack, Brenda Maxwell, Johana Halabi, James Calvin, Douglas Naudie, Melfort Boulton, Stephanie Handsor, Heather Whittle, Charlotte Kenning.

**Population Health Research Institute Coordinating Centre**: Lori Blake, Sanela Dragic-Taylor, Arielle Fernandez, Peggy Gao, Valerie Harvey, Peter Koh, Louise Mastrangelo, John Liu, Yan Yun Liu, Rajibul Mian, Wesley Tong, Jessica Vincent, Heidi Wilton.

**Event Adjudication Committee**: Flavia K Borges (Chair), Sandra Ofori, Michael Wang, James Khan, Rahima Nenshi, Maura Marcucci.

**Data Monitoring Committee**: Victor M. Montori (Chair), Finlay McAlister, Kristian Thorlund.

**APPENDIX 1. Sample consent form**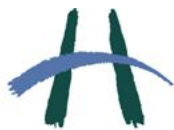

Hamilton Health Sciences

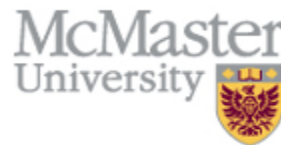

Inspiring Innovation and Discovery

**Informed Consent Form for Participation in a Research Study**

**Study Title:** Post discharge after surgery Virtual Care with Remote Automated Monitoring technology (PVC-RAM) Trial

**Study Doctor:** Dr. X

Co-Investigator: Dr. Y

**Sponsor/Funder(s):** Population Health Research Institute (PHRI)

**INTRODUCTION**

You are being invited to participate in a clinical trial (a type of study that involves research). You are invited to participate in this trial because you are aged 40 or older and have recently had urgent or emergency surgery. This consent form provides you with information to help you make an informed choice. Please read this document carefully and ask any questions you may have. All your questions should be answered to your satisfaction before you decide whether to participate in this research study.

The study staff will tell you about the study timelines for making your decision.

Taking part in this study is voluntary. You have the option to not participate at all or you may choose to leave the study at any time. Whatever you choose, it will not affect the usual medical care that you receive outside the study.

You will not be able to participate if you are unable to communicate with research staff, complete study surveys, or undertake an interview using a tablet computer due to a cognitive, language, visual, or hearing impairment; and/or reside in an area without cellular network coverage.

**IS THERE A CONFLICT OF INTEREST?**

There are no conflicts of interest to declare related to this study.

**WHAT IS THE BACKGROUND INFORMATION FOR THIS STUDY?**

Surgery is done to improve survival and quality of life. Unfortunately, complications like pain and infection can be a problem for some people during their recovery after surgery. Your risk of

wound infection, hospital readmission, or need to go to an emergency department or urgent care centre, is greatest in the first 30 days following your surgery. You may not see your surgeon, cardiologist or family doctor for several days or weeks after surgery. For example, it is common to wait up to 4 to 6 weeks to begin cardiac rehabilitation after cardiac surgery. Many complications, such as infection, pain, and medication errors can happen in the first few days following discharge home. If these problems are not dealt with fast enough, people can end up being readmitted to hospital or going to the emergency room. With the current pandemic of COVID-19, there may be COVID-19 positive patients in the hospital and it is important to reduce the risk of COVID-19 transmission to surgery patients if they need treatment or care from a nurse or doctor. We need to evaluate better ways of managing people's care after surgery, which helps prevent problems and helps people recover safely at home, and, at the same time, is sustainable for the healthcare system.

The standard or usual follow up timeline after surgery is a follow up visit or call from your surgeon. Depending on the type of surgery you have had, this follow up could be a telephone call or visit within a few days of your surgery, or up to 8 weeks after your surgery. During the COVID-19 pandemic, these timelines may be even longer.

### **WHY IS THIS STUDY BEING DONE?**

The purpose of this study is to evaluate the use of hospital-to-home care tools to monitor recovery safely at home after surgery and to determine if home monitoring can prevent hospital readmission, emergency department or urgent-care centre visits, or other new admissions to healthcare facilities (e.g. rehabilitation centres), by catching and managing health related issues before they become larger problems for you.

### **WHAT OTHER CHOICES ARE THERE?**

You do not have to take part in this study in order to receive treatment or care. Currently, home monitoring is not part of the standard of care after surgery. Your doctor will provide the best care for you.

### **HOW MANY PEOPLE WILL TAKE PART IN THIS STUDY?**

It is anticipated that about 900 people will take part in this study, from research sites located in Canada. This study should take less than one year to complete and the results should be known in about one year.

### **WHAT WILL HAPPEN DURING THIS STUDY?**

#### **ASSIGNMENT TO A GROUP**

If you decide to participate then you will be "randomized" into one of the groups described below. Randomization means that you are put into a group by chance (like flipping a coin). There is no way to predict which group you will be assigned to. You will have an equal chance of being placed in either group. Neither you, the study staff, nor the study doctors can choose

1  
2  
3 what group you will be in. After randomization, you will be told which group you are in. The  
4 study doctors, study nurses, and research teams will also know which group you are in.  
5

## 6 **WHAT IS THE STUDY INTERVENTION?**

7  
8  
9 **Group 1 (Virtual Care and remote monitoring):** Standard care (contact or visit with your  
10 surgeon after discharge and within the usual timeframe determined by your surgeon), plus virtual  
11 care and remote automated monitoring. If you are randomized to this group you will be  
12 monitored at home by study nurses for 30 days after discharge. You will be provided with a  
13 hospital to home kit that contains the following technologies: tablet computer (with stand),  
14 wrist-based blood pressure cuff (for blood pressure, pulse and breathing rate), finger worn pulse  
15 oximeter (for measuring your oxygen levels), thermometer (for temperature) and weigh scale (to  
16 monitor your weight). Monitoring will include daily video visits with a nurse for the first 15 days  
17 of the program and every other day after this. These video visits will take between 20-30 minutes  
18 to start. As you recover and become more comfortable with the technologies, the visits may  
19 become shorter.  
20  
21

22  
23 Prior to discharge, or shortly after discharge (by mail), you will receive the hospital to home kit  
24 which will include instructions on how to set up the devices, and the planned 30-day monitoring  
25 schedule. You will review the kit and follow up schedule with your virtual care nurse during  
26 your first video visit. You will be provided with training on how to use monitoring devices and  
27 the tablet application during the first video call. Study nurses will also answer any questions you  
28 have.  
29

30  
31 The measurements collected from the monitoring devices will be uploaded automatically to the  
32 companion tablet provided in the monitoring kit. The study nurse will then be able to review  
33 these measurements with you during your video visits. The frequency of daily biophysical  
34 measurements will be 3 times a day for the first 15 days, and then twice a day from day 16 until  
35 30 days after your start the study. Weight will be measured daily in the morning before  
36 breakfast. Vital signs and weight measurement frequency can be adjusted according to your  
37 tolerance based on the virtual nurse's judgement or based on directions from the most  
38 responsible physician. It is expected that at least one full set of biophysical parameters will be  
39 recorded each day of the study. In addition to the vitals collection, each day, for 30 days, you  
40 will answer surveys about how you are feeling. Your answers will be uploaded to the study nurse  
41 for review and may be discussed with you during the video visit. During the video visit, the  
42 study nurse will also ask you questions about your pain level and take a photograph of your  
43 wound to look for signs of infection.  
44  
45

46  
47 After the 30-day monitoring period has ended, you will be contacted by a member of the study  
48 team by phone at approximately 31 days and 6 months after hospital discharge and asked a few  
49 questions about your overall health, any complications you had during the follow up period, any  
50 time spent in a hospital or other health care facility, and medical related expenditures. You will  
51 be asked to package up the kit and prepare the kit for return using the prepaid slip and contacting  
52 the shipping company to confirm the kit is ready for pick up.  
53  
54  
55  
56  
57

**Group 2 (Standard Care):** Standard care (contact or visit with your surgeon after discharge and within the usual timeframe determined by your surgeon).

If you are randomized to this group you will receive the usual care provided for your recovery after surgery. You will be contacted by a study team member via telephone on approximately day 7, 15, 30, 31, and 6 months after you have been discharged from the hospital. The phone calls on days 7, 15 and 30 will last approximately 10 minutes. During these calls, you will be asked any pain you may be experiencing and if you have recently been to a hospital or other healthcare facility. During the 31-day call (approximately 31 days after discharge), you will be asked about any medications you are taking, if you have recently been to a hospital or other healthcare facility., any complications that happened during your recovery, pain, health and medical related expenditures. This call will take 20-30 minutes. The last call from the study team at approximately 6 months after your discharge will take 10 minutes. You will be asked about any medications you are taking, pain, and any time spent in a hospital or other healthcare facility since the last telephone call. This final call will take approximately 10 minutes.

### **WHAT ELSE DO I NEED TO KNOW ABOUT THE STUDY INTERVENTION?**

If at any point the study nurse feels your condition has worsened or thinks that you may experience a complication based on your vitals and video interview, the study nurse will have access to a study doctor 24 hours a day/ 7 days a week, to escalate your care. The study doctor will be able to assess you through telephone or video conferencing, and or may make clinical decisions (e.g., add or modify any of your treatments, refer you to other specialists, etc.) as they deem appropriate.

Outside of the regularly scheduled video visits you will also have access to a study nurse, 24 hours a day/ 7 days a week, should you feel that a change in your condition requires urgent contact with a healthcare provider.

The at home monitoring system from CloudDX used in the PVC-RAM study has previously been approved by Health Canada as monitoring systems. The monitoring system is not being tested in this study. We are investigating the clinical workflow and clinical and patient application of these approved devices.

### **WHAT ARE THE RESPONSIBILITIES OF STUDY PARTICIPANTS?**

If you choose to participate in this study, you will be expected to:

- Tell the study doctor about your current medical conditions;
- Tell the study doctor about all prescription and non-prescription medications and supplements, including vitamins and herbals, and check with the study doctor before starting, stopping or changing any of these;
- Tell the study doctor if you are thinking about participating in another research study; and
- Return the monitoring kit and all devices at the end of the follow up period.

### **HOW LONG WILL PARTICIPANTS BE IN THE STUDY?**

1  
2  
3  
4 The study intervention will last for about 30 days and total follow up is 6 months. The study  
5 team will collect information from your hospital chart relevant to your time in hospital for the  
6 surgery that made you eligible to participate in this trial. This may include items like your  
7 medical history prior to surgery, laboratory assessments performed as part of your routine care,  
8 details of your operation, and information on your recovery between surgery and hospital  
9 discharge.  
10  
11

12 No matter which group you are randomized to, and even if you stop the study intervention early,  
13 we would like to keep track of your health for up to 6 months after hospital to provide data on  
14 health system use and cost after surgery. We also require your permission to collect information  
15 on your clinical outcomes (e.g., hospitalizations). This will be done by linking information like  
16 your health card number, name, date of birth to health care databases held at the Institute for  
17 Clinical Evaluative Sciences (ICES). The ICES databases contain information about physician,  
18 hospital, home care services and medications that are paid for by the Ontario government. The  
19 linkage of your data with ICES databases will be done in order to evaluate the efficacy of the  
20 intervention and assess its long-term outcomes.  
21  
22

### **CAN PARTICIPANTS CHOOSE TO LEAVE THE STUDY?**

23  
24  
25

26 You can choose to end your participation in this research (called withdrawal) at any time without  
27 having to provide a reason. If you choose to withdraw from the study, you are encouraged to  
28 contact the study doctor or study staff and discuss the level of withdrawal. Information that was  
29 recorded before you withdrew will be used by the researchers for the purposes of the study, but  
30 no information will be collected or sent to the sponsor after you withdraw your permission.  
31  
32

### **CAN PARTICIPATION IN THIS STUDY END EARLY?**

33  
34

35 The study doctor may stop your participation in the study early, and without your consent, for  
36 reasons such as:  
37

- 38 • You are unable to complete all required study procedures;
- 39 • The Sponsor decides to stop the study; or
- 40 • The Regulatory Authority/ies (for example, Health Canada) or research ethics board  
41 withdraw permission for this study to continue  
42  
43  
44

45 If this happens, it may mean that you would not receive the study intervention for the full period  
46 described in this consent form. If you are removed from this study, the study doctor will discuss  
47 the reasons with you.  
48  
49

### **WHAT ARE THE RISKS OR HARMS OF PARTICIPATING IN THIS STUDY?**

50  
51

52 If you are randomized to the intervention, you will be required to use a wrist-based blood  
53 pressure monitor, and a wireless pulse oximeter. These devices may feel uncomfortable at times.  
54 You may discuss comfort of these devices with the virtual care nurse during your daily video  
55 visits.  
56  
57



## **WHAT ARE THE BENEFITS OF PARTICIPATING IN THIS STUDY?**

If you are randomized to the Virtual care and remote monitoring arm of the study you may benefit from the increased monitoring. Due to the increased monitoring, you will also have increased contact with study nurses compared to standard care. Study nurses may be able to identify health issues faster than usual. Your participation in this study may add to the medical knowledge about remote monitoring in patients after surgery.

## **HOW WILL PARTICIPANT INFORMATION BE KEPT CONFIDENTIAL?**

If you decide to participate in this study, the study doctors and study staff will only collect the information they need for this study. Records identifying you at this centre will be kept confidential and, to the extent permitted by the applicable laws, will not be disclosed or made publicly available, except as described in this consent document.

Authorized representatives of the following organizations may look at your original (identifiable) medical/clinical study records at the site where these records are held, to check that the information collected for the study is correct and follows proper laws and guidelines.

- Population Health Research Institute, the Sponsor of this study
- The research ethics board who oversees the ethical conduct of this study in Ontario
- This institution and affiliated sites, to oversee the conduct of research at this location

Information that is collected about you for the study (called study data) may also be sent to the organizations listed above. Representatives of Clinical Trials Ontario, a not-for-profit organization, may see study data that is sent to the research ethics board for this study. Your name, address, email, or other information that may directly identify you will not be used. The records received by these organizations may contain your participant code, initials, sex, and date of birth.

### **The following organizations will also receive study data:**

- Institute for evaluative clinical sciences (ICES)
- CloudDX Diagnostics Inc., technology service provider for in home monitoring and video follow up

Studies involving humans sometimes collect information on race and ethnicity as well as other characteristics of individuals because these characteristics may influence how people respond to different interventions. Providing information on your race or ethnic origin is voluntary.

This study requires the transfer of identifiable information to the Institute of Evaluative Clinical Sciences (ICES) for the purposes of longer term (6 month) follow up, health systems costs and health system use analysis.

1  
2  
3 To do this we would like to gather more information about your medical care from the Institute  
4 for Clinical Evaluative Sciences (ICES). ICES is an independent research facility in Toronto, ON  
5 that studies the impact of health care and diseases in Ontario. ICES has special status under  
6 Ontario privacy law, allowing for the collection and use of patient data, including information  
7 about the use of physician services, hospitalizations, and prescriptions for patients residing in  
8 this province. In order to have this special status, ICES is required by law to have its policies and  
9 procedures, related to the security and privacy protection of data, reviewed and approved by the  
10 Information and Privacy Commissioner of Ontario every three years. All data are coded and  
11 kept in a secure environment, to maintain individual confidentiality.  
12  
13

14  
15 Your study data will be entered into a password-protected database and kept in a secure location  
16 at the PHRI. This database can only be accessed by authorized members of our research team  
17 and will be used to study health outcomes related to surgery and use of health services during  
18 your hospitalization and up to 6 months after your participation in the trial began. The risks  
19 associated with allowing ICES to use your information are minimal, as the data at ICES are  
20 anonymized using unique identifiers and kept in a secure environment, and individuals are never  
21 identified.  
22

23  
24 By providing your consent to participate you are agreeing that the following information will be  
25 transferred:

- 26 • OHIP number
  - 27 • Full first name
  - 28 • Full last name
  - 29 • Date of birth
  - 30 • Sex
  - 31 • Postal code
- 32  
33

34  
35 This information will be securely transferred from Population Health Research Institute (where  
36 the research is taking place) by or on behalf of the study investigators to the Institute for Clinical  
37 Evaluative Sciences (ICES) so the required linkages can be made to gather the information for  
38 the study. The study investigators will be permitted to access de-identified information only for  
39 analysis (i.e., any information that can directly identify a person like health card number or name  
40 will be removed or replaced with a code that is not known to the study investigators).  
41

42  
43 If the results of this study are published, your identity will remain confidential. It is expected that  
44 the information collected during this study will be used in analyses and will be published/  
45 presented to the scientific community at meetings and in journals. This information may also be  
46 used as part of a submission to regulatory authorities around the world to support the approval of  
47 the study intervention.  
48

49  
50 The at-home system is not connected to the hospital. The Connected Health mobile application  
51 was designed by Cloud DX. The Cloud DX system will be receiving your personal data entered  
52 and it will be stored. Cloud DX will have access to your de-identified data for internal research,  
53 development, and regulatory filings. The Cloud DX Connected Health platform is a secure  
54 remote patient monitoring solution with all cloud data residing on secure Microsoft Azure  
55 servers. The cloud data storage resides entirely in Canada on servers physically located in  
56  
57



1  
2  
3 Toronto and Quebec (including all backup images), which meet HIPAA compliance for cloud  
4 services against ISO 27001 and SOC 2 certifications. During the study, your personal health  
5 information will be visible to research team members located across the participating hospital  
6 sites, and on restricted access by Cloud DX personnel for technical support. To ensure  
7 cybersecurity and patient privacy, the Samsung tablet supports cellular communications through  
8 Health Insurance Probability and Accountability Act (HIPAA)-compliant cloud infrastructure.  
9 Any data stored in the CloudDX cloud will be de-identified before exporting to our research  
10 database.  
11  
12

13 This study will use the CloudDX pulsewave platform to perform intervention/collect data, which  
14 is an externally hosted cloud-based service. A link to their privacy policy is available here  
15 (<https://www.clouddx.com/#/privacy>). Please note that whilst this service has been approved by  
16 the Hamilton Integrated Research Ethics Board for collecting data in this study, there is a small  
17 risk, as with any platform such as this, of data collected on external servers falling outside the  
18 control of the research team. Please talk to the researcher if you have any concerns.  
19  
20

### **WILL FAMILY DOCTORS/HEALTH CARE PROVIDERS KNOW WHO IS PARTICIPATING IN THIS STUDY?**

21  
22  
23  
24  
25 Your surgeon and your family doctor/health care provider may be informed that you are taking  
26 part in a study so that you can be provided with appropriate medical care. If you do not want  
27 your family doctor/health care provider to be informed, please discuss this with the study team.  
28  
29

### **WILL INFORMATION ABOUT THIS STUDY BE AVAILABLE ONLINE?**

30  
31 A description of this clinical trial will be available on <https://clinicaltrials.gov>. This website will  
32 not include information that can identify you. You can search this website at any time.  
33  
34

### **WHAT IS THE COST TO PARTICIPANTS?**

35  
36  
37 The virtual care and remote monitoring technologies will be supplied at no charge while you take  
38 part in this study. Participation in this study will not involve any additional costs to you or your  
39 private health care insurance.  
40  
41

### **ARE STUDY PARTICIPANTS PAID TO BE IN THIS STUDY?**

42  
43 You will not be paid for taking part in this study. In the case of research-related side effects or  
44 injury, medical care will be provided by the study investigator, to help you recover from the  
45 injury or refer you for appropriate treatment. Costs for medical care that you might incur for  
46 injuries or illnesses that are not a direct result of research activities will not be covered by the  
47 study.  
48  
49

### **WHAT ARE THE RIGHTS OF PARTICIPANTS IN A RESEARCH STUDY?**

50  
51  
52 You will be told, in a timely manner, about new information that may be relevant to your  
53 willingness to stay in this study.  
54  
55  
56  
57



- I do not give up any legal rights by signing this consent form,
- I understand that my family doctor/health care provider may be informed of study participation
- I agree to take part in this study.

\_\_\_\_\_  
 Signature of Participant                      PRINTED NAME                      Date/Time

\_\_\_\_\_  
 Signature of Person Conducting the Consent Discussion                      PRINTED NAME & ROLE                      Date/Time

OR

*Verbal Consent obtained*                      PARTICIPANT'S PRINTED NAME                      Date/Time

\_\_\_\_\_  
 Signature of Person who obtained verbal consent                      PRINTED NAME & ROLE                      Date/Time

Confidential

## APPENDIX 2. Biophysical measurements and recovery survey

Based on a schedule developed by a virtual nurse, the tablet prompts patients to measure their biophysical parameters. The frequency of daily biophysical measurements is 3 times a day for the first 15 days, and then twice a day from day 16 until 30 days after randomization. Weight is measured daily in the morning before breakfast. Measurement of biophysical parameters can be adjusted according to a patient's acuity and tolerance, based on the virtual nurse's judgement or directions from a physician. Patients record at least one full set of biophysical parameters each day of the study. The tablet prompts patients daily to complete the recovery survey. The recovery survey consists of questions related to infection, bleeding, pain, dehydration, ileus, and cardiovascular and respiratory complications.

### APPENDIX 3. Tertiary outcomes

Tertiary outcomes during the first 30 days after randomization include: 1. health services utilization-related costs; 2. patient-level cost of recovery; 3. re-operation; 4. arrhythmia resulting in electrical cardioversion; 5. acute renal failure resulting in dialysis; 6. respiratory failure; 7. infection; 8. surgical site infection; 9. life-threatening, major, or critical-organ bleeding; 10. ileus; 11. myocardial infarction; 12. clinically important atrial fibrillation; 13. symptomatic proximal venous thrombo-embolism; 14. stroke; 15. non-fatal cardiac arrest; 16. clostridium difficile-associated diarrhea; and 17. indwelling device inappropriately left in a patient.

Additional tertiary outcome during the first 6 months after randomization include: 1. the secondary outcomes; and 2. health services utilization-related costs.

#### APPENDIX 4. Outcome definitions

| Outcome               | Definition                                                                                                                                                                                                                                                                                                                                                                                                                                                                                                                                                                                                                                                                                                                                                                                                                                                                                                                                                                                                                                                                                                                                                                                                                                                                                                                                                                                                                                                                                                                                                                                                                                                                                                                                                                                                                                                                                                                                                                                                                                                                                                                                                                                                                                                                                                                                                                                |
|-----------------------|-------------------------------------------------------------------------------------------------------------------------------------------------------------------------------------------------------------------------------------------------------------------------------------------------------------------------------------------------------------------------------------------------------------------------------------------------------------------------------------------------------------------------------------------------------------------------------------------------------------------------------------------------------------------------------------------------------------------------------------------------------------------------------------------------------------------------------------------------------------------------------------------------------------------------------------------------------------------------------------------------------------------------------------------------------------------------------------------------------------------------------------------------------------------------------------------------------------------------------------------------------------------------------------------------------------------------------------------------------------------------------------------------------------------------------------------------------------------------------------------------------------------------------------------------------------------------------------------------------------------------------------------------------------------------------------------------------------------------------------------------------------------------------------------------------------------------------------------------------------------------------------------------------------------------------------------------------------------------------------------------------------------------------------------------------------------------------------------------------------------------------------------------------------------------------------------------------------------------------------------------------------------------------------------------------------------------------------------------------------------------------------------|
| Days alive at home    | <p>Days alive at home are the number of days patients spend at their usual residence – be it a house or apartment, a group home or shelter, a seniors’ residence, or a nursing home – or at a community residence of a relative, friend, or acquaintance without, during that day, being admitted to a hospital or visiting an emergency department or urgent-care centre. Thus, patients lose days alive at home if 1. patients go to an emergency department or urgent-care centre; 2. they become inpatients at a hospital or rehabilitation or convalescence-care facility; or 3. they die.</p> <p>More specifically, our approach to calculating days alive at home follows. If a patient visits an emergency department or urgent-care centre anytime between midnight and 23:59 on a given day, they will lose that day as a day alive at home. If a patient visits an emergency department or urgent-care centre anytime between midnight and 23:59 on a given day and they remain in the emergency department or urgent-care centre past midnight into the next day, then they lose 2 day alive at home. If a patient is admitted to the hospital or rehabilitation or convalescence-care facility anytime between midnight and 23:59 on a given day, they will lose that day as a day alive at home. They will continue to lose days alive at home until the day in which they are home and out of an acute-hospital care or a rehabilitation or convalescence-care facility from midnight for an entire day. Patients randomized before hospital discharge do not lose this day alive at home unless after their discharge they die or visit an emergency department or urgent-care centre on the day of their discharge. Patients randomized before hospital discharge will lose this day alive at home if their discharge is ultimately delayed and they do not go home on their day of randomization.</p> <p>Because patients are followed until day 30 after randomization and the day of randomization is day 0, if a patient is discharged home after randomization and remains at home until death on day 2 after randomization (i.e., they survived at home on the day of randomization and day 1 after randomization, but died on the subsequent day) they would be counted as having had 2 day alive at home, and lose 29 of the possible 31 days alive at home.</p> |
| Hospital re-admission | Patient admission to an acute-care hospital.                                                                                                                                                                                                                                                                                                                                                                                                                                                                                                                                                                                                                                                                                                                                                                                                                                                                                                                                                                                                                                                                                                                                                                                                                                                                                                                                                                                                                                                                                                                                                                                                                                                                                                                                                                                                                                                                                                                                                                                                                                                                                                                                                                                                                                                                                                                                              |

|                            |                                                                                                                                                                                                                                                                                                                                                                                                                                                                                                                                                                                                                                                                                                                                                                                                                                                                                                                                                                                                                                                                                                                                                                                                                                                                                                                   |
|----------------------------|-------------------------------------------------------------------------------------------------------------------------------------------------------------------------------------------------------------------------------------------------------------------------------------------------------------------------------------------------------------------------------------------------------------------------------------------------------------------------------------------------------------------------------------------------------------------------------------------------------------------------------------------------------------------------------------------------------------------------------------------------------------------------------------------------------------------------------------------------------------------------------------------------------------------------------------------------------------------------------------------------------------------------------------------------------------------------------------------------------------------------------------------------------------------------------------------------------------------------------------------------------------------------------------------------------------------|
| Emergency department visit | Patient visit to an emergency department.                                                                                                                                                                                                                                                                                                                                                                                                                                                                                                                                                                                                                                                                                                                                                                                                                                                                                                                                                                                                                                                                                                                                                                                                                                                                         |
| Urgent-care centre visit   | Patient visit to an urgent-care centre.                                                                                                                                                                                                                                                                                                                                                                                                                                                                                                                                                                                                                                                                                                                                                                                                                                                                                                                                                                                                                                                                                                                                                                                                                                                                           |
| Acute-hospital care        | Acute-hospital care is a composite outcome of hospital re-admission and emergency department or urgent-care centre visit                                                                                                                                                                                                                                                                                                                                                                                                                                                                                                                                                                                                                                                                                                                                                                                                                                                                                                                                                                                                                                                                                                                                                                                          |
| Brief acute-hospital care  | Acute-hospital care that last <24 hours from the time of arrival to the time of discharge home.                                                                                                                                                                                                                                                                                                                                                                                                                                                                                                                                                                                                                                                                                                                                                                                                                                                                                                                                                                                                                                                                                                                                                                                                                   |
| All-cause hospital days    | If a patient is admitted to the hospital for any reason anytime between midnight and 23:59 on a given day, this will count as a day in hospital. Study personnel will determine the total number of days in the hospital for any reason. Patients randomized before hospital discharge do not have this day counted as a hospital day unless after their discharge they are re-admitted to the hospital on the day of their discharge. Patients randomized before hospital discharge will have this day counted as a hospital day if their discharge is ultimately delayed and they do not go home on their day of randomization.                                                                                                                                                                                                                                                                                                                                                                                                                                                                                                                                                                                                                                                                                 |
| COVID-19 infection         | For COVID-19 infection, we will accept any laboratory confirmed evidence of COVID-19 infection.                                                                                                                                                                                                                                                                                                                                                                                                                                                                                                                                                                                                                                                                                                                                                                                                                                                                                                                                                                                                                                                                                                                                                                                                                   |
| Medication error detection | <p>Medication errors include mistakes in medication prescribing, transcribing, dispensing, administering, or monitoring due to preventable events or actions taken by a patient, caregiver, or healthcare worker. Medication errors include: drug omission (i.e., patient did not take a drug they were supposed to take), drug commission (i.e., patient taking a drug they were not supposed to take), duration error, dosing error, frequency error, route error, and timing error. We will record all drug errors identified and also report whether they resulted in harm.</p> <p>We will use the following definitions for harm: 1. no harm – error that does not cause any clinically appreciable harm to the patient; 2. minor harm – error that leads to event resulting in minor treatment or extra monitoring to ensure significant harm is avoided (e.g., mild symptoms or minimal loss of function; one day of symptoms; laboratory abnormality not requiring emergency department or urgent-care centre visit); 3. moderate harm – error that leads to event requiring treatment or extra monitoring and causes temporary but not permanent harm (e.g., laboratory abnormality, symptoms, or condition requiring emergency department or urgent-care centre visit); 4. severe harm – error that</p> |

|                                                                 |                                                                                                                                                                                                                                                                                                                                                                                                                                                                                                                                                                                                                                                                                                                                                                                                                     |
|-----------------------------------------------------------------|---------------------------------------------------------------------------------------------------------------------------------------------------------------------------------------------------------------------------------------------------------------------------------------------------------------------------------------------------------------------------------------------------------------------------------------------------------------------------------------------------------------------------------------------------------------------------------------------------------------------------------------------------------------------------------------------------------------------------------------------------------------------------------------------------------------------|
|                                                                 | leads to event that requires treatment or extra monitoring and results in significant or permanent harm (e.g., permanent disability or loss of function; near-death event [e.g., anaphylaxis, cardiac arrest]; serious laboratory abnormality, symptom, or condition requiring intervention to sustain life or leading to prolonged hospitalization); and 5. death – error leading to loss of life.                                                                                                                                                                                                                                                                                                                                                                                                                 |
| Medication error correction                                     | Any medication error that is corrected.                                                                                                                                                                                                                                                                                                                                                                                                                                                                                                                                                                                                                                                                                                                                                                             |
| Delirium                                                        | <p>The diagnosis of delirium based on remote assessment (i.e. telephone or videoconference interview) is met when either 1. or 2. is met:</p> <ol style="list-style-type: none"> <li>1. Patient able to complete the interview and meeting the delirium criteria as per the Confusion Assessment Method, (i.e., a. acute onset of symptoms OR fluctuating course of symptoms, AND b. inattention AND either c. disorganized thinking or d. altered level of consciousness.</li> <li>2. Patient unable to complete the interview because too confused. This criterion is applicable when patients are able to complete telephone interviews at baseline, which is consistent with one of our eligibility criteria. In this case, this is significant for an acute decline in their cognitive performance.</li> </ol> |
| Surgeon, family physician, or specialist in-person clinic visit | Patient in-person visit to a surgeon's, family physician's, or specialist's clinic.                                                                                                                                                                                                                                                                                                                                                                                                                                                                                                                                                                                                                                                                                                                                 |
| Surgeon, family physician, or specialist virtual clinic visit   | Patient has a virtual clinical visit with a surgeon, family physician, or specialist.                                                                                                                                                                                                                                                                                                                                                                                                                                                                                                                                                                                                                                                                                                                               |
| Sepsis                                                          | Our definition of sepsis is based on the Third International Consensus Definitions for Sepsis and Septic Shock (Sepsis-3). Sepsis requires a quick Sequential Organ Failure Assessment (qSOFA) Score $\geq 2$ points due to infection. The qSOFA includes the following items and scoring system: 1. altered mental status (1 point); 2. systolic blood pressure $\leq 100$ mm Hg (1 point); and 3. respiratory rate $\geq 22$ breaths per minute (1 point).                                                                                                                                                                                                                                                                                                                                                        |
| Acute heart failure                                             | <p>The definition of acute heart failure requires at least one of the following clinical signs (i.e., elevated jugular venous pressure, respiratory rales or crackles, crepitations, or presence of S3) with at least one of the following:</p> <ol style="list-style-type: none"> <li>1. radiographic findings of vascular redistribution, interstitial pulmonary edema, or frank alveolar pulmonary edema, OR</li> </ol>                                                                                                                                                                                                                                                                                                                                                                                          |



|                                           |                                                                                                                                                                                                                                                                                                                                                                                                                                                                                                                                                                                                                                                                                                                                                                                                                                                                                                                                                                                                                                                                                                                                           |
|-------------------------------------------|-------------------------------------------------------------------------------------------------------------------------------------------------------------------------------------------------------------------------------------------------------------------------------------------------------------------------------------------------------------------------------------------------------------------------------------------------------------------------------------------------------------------------------------------------------------------------------------------------------------------------------------------------------------------------------------------------------------------------------------------------------------------------------------------------------------------------------------------------------------------------------------------------------------------------------------------------------------------------------------------------------------------------------------------------------------------------------------------------------------------------------------------|
|                                           | 2. heart failure treatment with a diuretic and documented clinical improvement.                                                                                                                                                                                                                                                                                                                                                                                                                                                                                                                                                                                                                                                                                                                                                                                                                                                                                                                                                                                                                                                           |
| Death                                     | The definition of death is all cause mortality.                                                                                                                                                                                                                                                                                                                                                                                                                                                                                                                                                                                                                                                                                                                                                                                                                                                                                                                                                                                                                                                                                           |
| Pain                                      | Pain intensity and related interference with usual daily activities, will be measured via the Brief Pain Inventory-Short Form (BPI-SF). The BPI-SF includes four 11-point numeric rating scales (NRS) of pain intensity, which measure “average”, “least”, and “worst” pain intensity in the past 24 hours (hrs.), respectively, as well as pain intensity “now” (0= no pain, 10= pain as bad as you can imagine). The BPI-SF interference subscale will also be used, which measures the degree to which pain interferes with general activity, mood, walking, work, relations with others, sleep, and enjoyment of life (NRS for each item; 0=does not interfere, 10=completely interferes). A total interference score is determined by calculating the sum of these 7 items. The BPI-SF has strong psychometric properties with well-established reliability and validity across divergent surgical groups.                                                                                                                                                                                                                           |
| Health services utilization-related costs | Data on hospital re-admission, healthcare utilization, and costs of health service utilization will be obtained from the <i>Institute for Clinical Evaluative Sciences</i> (ICES) data repository. Administrative databases used to describe the health service utilization include: 1. Registered Persons Database (RPDB) – demographics and vital statistics of all legal residents of Ontario; 2. Discharge Abstract Database – records of inpatient hospitalizations from the Canadian Institute for Health Information (CIHI); 3. Ontario Health Insurance Plan (OHIP) Database – physician billing claims, and the National Ambulatory Care Reporting System – information on emergency department visits from CIHI. In addition, to capture data on times spent on the Cloud DX Connected Health mobile application by health providers (e.g., virtual nurses), costs of health providers’ time will be captured in the system reporting. Costs of health providers’ time on the Cloud DX Connected Health mobile application will be calculated by multiplying the time with unit costs from standard costing sources in Ontario. |
| Patient-level cost of recovery            | The Ambulatory and Home Care Record (AHCR) will be used to comprehensively measure patient-level costs of illness from a societal perspective. This approach gives equal consideration to health system costs and costs borne by patients and unpaid caregivers (e.g., family members, friends). AHCR items can be categorized as publicly financed (e.g., public sector paid resources) or privately financed care (e.g., all out-of-pocket and third-party                                                                                                                                                                                                                                                                                                                                                                                                                                                                                                                                                                                                                                                                              |

|                                                  |                                                                                                                                                                                                                                                                                                                                                             |
|--------------------------------------------------|-------------------------------------------------------------------------------------------------------------------------------------------------------------------------------------------------------------------------------------------------------------------------------------------------------------------------------------------------------------|
|                                                  | insurance payments, and time costs incurred by caregiver). Face validity and reliability of the AHCR is well established in multiple groups, including surgical patients.                                                                                                                                                                                   |
| Re-operation                                     | Re-operation refers to any surgical procedure undertaken for any reason (e.g., wound dehiscence, infection)                                                                                                                                                                                                                                                 |
| Arrhythmia resulting in electrical cardioversion | Any arrhythmia that leads to electrical cardioversion.                                                                                                                                                                                                                                                                                                      |
| Acute renal failure resulting in dialysis        | This outcome is defined as acute renal failure that results in dialysis (i.e., use of hemodialysis machine or peritoneal dialysis apparatus) in a patient who was not on chronic dialysis before randomization.                                                                                                                                             |
| Respiratory failure                              | Patient intubated or put on bilevel positive airway pressure (BiPAP).                                                                                                                                                                                                                                                                                       |
| Infection                                        | Infection is defined as a pathologic process caused by the invasion of normally sterile tissue, fluid, or body cavity by pathogenic or potentially pathogenic organisms.                                                                                                                                                                                    |
| Surgical site infection                          | Surgical site infection is an infection that occurs within 30 days after surgery and involves the skin, subcutaneous tissue of the incision (superficial incisional), or the deep soft tissue (e.g., fascia, muscle) of the incision (deep incisional).                                                                                                     |
| Life-threatening bleeding                        | Life-threatening bleeding is bleeding that is fatal, or leads to: significant hypotension that requires inotrope or vasopressor therapy, urgent (within 24 hours) surgery (other than superficial vascular repair), or intracranial hemorrhage.                                                                                                             |
| Major bleeding                                   | Major bleeding is defined as bleeding that is not specified under “life-threatening bleeding” and results in at least one of the following: 1. a postoperative hemoglobin $\leq 70$ g/L; 2. a transfusion of $\geq 1$ unit of red blood cells; or 3. leads to one of the following interventions: embolization, superficial vascular repair, nasal packing. |
| Critical-organ bleeding                          | Critical-organ bleeding is bleeding that is intracranial, intraocular, intraspinal, pericardial, retroperitoneal, or intramuscular with compartment syndrome.                                                                                                                                                                                               |
| Ileus                                            | Ileus is a physician diagnosis of functional obstruction of the gastrointestinal tract in the absence of an alternative diagnosis that                                                                                                                                                                                                                      |

leads to postoperative decreased bowel activity. The definition requires the following criteria: 1. inability to pass flatus or stool for >24 hours; and 2. persistence of one or more of the following signs and symptoms for >24 hours: abdominal distention; diffuse abdominal pain; or nausea or vomiting.

---

#### Myocardial infarction

The diagnosis of myocardial infarction requires one of the following criteria:

1. Detection of a rise or fall of a cardiac biomarker (preferably troponin) with at least one value above the 99<sup>th</sup> percentile of the upper reference limit (URL) together with evidence of myocardial ischemia with at least one of the following:
    - A. ischemic signs or symptoms (i.e., chest, arm, neck, or jaw discomfort; shortness of breath, pulmonary edema);
    - B. development of pathologic Q waves present in any two contiguous leads that are  $\geq 30$  milliseconds;
    - C. new or presumed ECG changes indicative of ischemia (i.e., ST segment elevation [ $\geq 2$  mm in leads V<sub>1</sub>, V<sub>2</sub>, or V<sub>3</sub> OR  $\geq 1$  mm in the other leads], ST segment depression [ $\geq 1$  mm], or symmetric inversion of T waves  $\geq 1$  mm) in at least two contiguous leads;
    - D. new LBBB; or
    - E. new cardiac wall motion abnormality on echocardiography or new fixed defect on radionuclide imaging
    - F. identification of intracoronary thrombus on angiography or autopsy
  2. Cardiac death, with symptoms suggestive of myocardial ischemia and presumed new ischemic ECG changes or new LBBB, but death occurred before cardiac biomarkers were obtained, or before cardiac biomarker values would be increased.
  3. Percutaneous coronary intervention (PCI) related myocardial infarction is defined by elevation of a troponin value ( $>5$  x 99<sup>th</sup> percentile URL) in patients with a normal baseline troponin value ( $\leq 99$ <sup>th</sup> percentile URL) or a rise of a troponin measurement  $>20\%$  if the baseline values are elevated and are stable or falling. In addition, either (i) symptoms suggestive of myocardial ischemia or (ii) new ischemic ECG changes or (iii) angiographic findings consistent with a procedural complication or (iv) imaging demonstration of new loss of viable myocardium or new regional wall motion abnormality are required.
-

- 
- 1  
2  
3  
4  
5  
6  
7  
8  
9  
10  
11  
12  
13  
14  
15  
16  
17  
18  
19  
20  
21  
22  
23  
24  
25  
26  
27  
28  
29  
30  
31  
32  
33  
34  
35  
36  
37  
38  
39  
40  
41  
42  
43  
44  
45  
46  
47  
48  
49  
50  
51  
52
4. Stent thrombosis associated with myocardial infarction when detected by coronary angiography or autopsy in the setting of myocardial ischemia and with a rise and/or fall of cardiac biomarker values with at least one of value above the 99th percentile URL.
  5. Coronary artery bypass grafting (CABG) related myocardial infarction is defined by elevation of cardiac biomarker values ( $>10 \times$  99th percentile URL) in patients with a normal baseline troponin value ( $\leq$ 99th percentile URL). In addition, either (i) new pathological Q waves or new LBBB, or (ii) angiographic findings consistent with a procedural flow-limiting complication such as coronary dissection, occlusion of a major epicardial artery or graft, side-branch occlusion-thrombus, disruption of collateral flow or distal embolization, or (iii) imaging evidence of new loss of viable myocardium or new regional wall motion abnormality.
  6. For patients who are believed to have suffered a myocardial infarction within 28 days of a MINS event or within 28 days of a prior myocardial infarction, the following criterion for myocardial infarction is required:  
Detection of a rise or fall of a cardiac biomarker (preferably troponin) with at least one value above the 99<sup>th</sup> percentile of the upper reference limit (URL) and 20% higher than the last troponin measurement related to the preceding event together with evidence of myocardial ischemia with at least one of the following:
    - A. ischemic signs or symptoms (i.e., chest, arm, neck, or jaw discomfort; shortness of breath, pulmonary edema);
    - B. development of pathologic Q waves present in any two contiguous leads that are  $\geq 30$  milliseconds;
    - C. new or presumed new ECG changes indicative of ischemia (i.e., ST segment elevation [ $\geq 2$  mm in leads  $V_1$ ,  $V_2$ , or  $V_3$  OR  $\geq 1$  mm in the other leads], ST segment depression [ $\geq 1$  mm], or symmetric inversion of T waves  $\geq 1$  mm) in at least two contiguous leads;
    - D. new LBBB; or
    - E. new cardiac wall motion abnormality on echocardiography or new fixed defect on radionuclide imaging
    - F. identification of intracoronary thrombus on angiography or autopsy

---

Clinically important atrial fibrillation

The definition of clinically important atrial fibrillation requires the documentation of atrial fibrillation or atrial flutter on a 12 lead electrocardiogram, or confirmed atrial fibrillation or atrial flutter

---

|                                             |                                                                                                                                                                                                                                                                                                                                                                                                                                                                                                                                                                                                                                                                                                                                                                                                                                                      |
|---------------------------------------------|------------------------------------------------------------------------------------------------------------------------------------------------------------------------------------------------------------------------------------------------------------------------------------------------------------------------------------------------------------------------------------------------------------------------------------------------------------------------------------------------------------------------------------------------------------------------------------------------------------------------------------------------------------------------------------------------------------------------------------------------------------------------------------------------------------------------------------------------------|
|                                             | (e.g., rhythm strip) that results in angina, congestive heart failure, symptomatic hypotension, or requires treatment with a rate controlling drug, antiarrhythmic drug, or electrical cardioversion.                                                                                                                                                                                                                                                                                                                                                                                                                                                                                                                                                                                                                                                |
| Symptomatic proximal venous thromboembolism | Venous thromboembolism that includes symptomatic pulmonary embolism or symptomatic proximal deep vein thrombosis.                                                                                                                                                                                                                                                                                                                                                                                                                                                                                                                                                                                                                                                                                                                                    |
| Symptomatic pulmonary embolism              | The diagnosis of symptomatic pulmonary embolism requires symptoms (e.g., dyspnea, pleuritic chest pain) and any one of the following: <ol style="list-style-type: none"> <li>1. A high probability ventilation/perfusion lung scan;</li> <li>2. An intraluminal filling defect of segmental or larger artery on a helical CT scan;</li> <li>3. An intraluminal filling defect on pulmonary angiography; or</li> <li>4. A positive diagnostic test for DVT (e.g., positive compression ultrasound) and one of the following: <ol style="list-style-type: none"> <li>A. non-diagnostic (i.e., low or intermediate probability) ventilation/perfusion lung scan, or</li> <li>B. non-diagnostic (i.e., subsegmental defects or technically inadequate study) helical CT scan</li> </ol> </li> </ol>                                                      |
| Symptomatic proximal deep venous thrombosis | The diagnosis of symptomatic proximal deep venous thrombosis (DVT) requires: <ol style="list-style-type: none"> <li>1. symptoms or signs that suggest DVT (e.g., leg pain or swelling),</li> <li>2. thrombosis involving the popliteal vein or more proximal veins for leg DVT OR axillary or more proximal veins for arm DVTs</li> </ol> Any of the following defines evidence of vein thrombosis: <ol style="list-style-type: none"> <li>A. a persistent intraluminal filling defect on contrast venography (including on computed tomography);</li> <li>B. noncompressibility of one or more venous segments on B mode compression ultrasonography; or</li> <li>C. a clearly defined intraluminal filling defect on doppler imaging in a vein that cannot have compressibility assessed (e.g., iliac, inferior vena cava, subclavian).</li> </ol> |
| Stroke                                      | Stroke is defined as either: 1. a new focal neurological deficit thought to be vascular in origin with signs or symptoms lasting $\geq 24$ hours or leading to death; or 2. a new focal neurological deficit thought to be vascular in origin with signs or symptoms lasting $< 24$ hours with positive neuroimaging consistent with a stroke.                                                                                                                                                                                                                                                                                                                                                                                                                                                                                                       |
| Non-fatal cardiac arrest                    | Non-fatal cardiac arrest is defined as successful resuscitation from either documented or presumed ventricular fibrillation, sustained ventricular tachycardia, asystole, or pulseless electrical activity                                                                                                                                                                                                                                                                                                                                                                                                                                                                                                                                                                                                                                           |

1  
2  
3  
4  
5  
6  
7  
8  
9  
10  
11  
12  
13  
14  
15  
16  
17  
18  
19  
20  
21  
22  
23  
24  
25  
26  
27  
28  
29  
30  
31  
32  
33  
34  
35  
36  
37  
38  
39  
40  
41  
42  
43  
44  
45  
46  
47  
48  
49  
50  
51  
52  
53  
54  
55  
56  
57  
58  
59  
60

---

|                                                     |                                                                                                                                                                                                                      |
|-----------------------------------------------------|----------------------------------------------------------------------------------------------------------------------------------------------------------------------------------------------------------------------|
|                                                     | requiring cardiopulmonary resuscitation, pharmacological therapy, or cardiac defibrillation.                                                                                                                         |
| Clostridium difficile-associated diarrhea           | This outcome requires diarrhea as a symptom with laboratory documentation of Clostridium difficile.                                                                                                                  |
| Indwelling device inappropriately left in a patient | An indwelling device (e.g., drain, catheter, pacemaker wire) inappropriately left in patient is defined as an indwelling device inappropriately being left in a bodily organ or passage longer than it was intended. |

---

Confidential
